1     Body mass index multiple regression formula testable by  
2             eight Bradford Hill causality criteria: Worldwide  
3     ecological cohort data analysis to inform dietary guidance

4

5

6     David K Cundiff (0000-0002-3206-9665), independent researcher,<sup>1 3</sup> Chunyi Wu (0000-0002-  
7     2186-3433), Research Epidemiologist/Statistician<sup>2 3</sup>

8     <sup>1</sup> Long Beach, California, USA

9     <sup>2</sup> Area Specialist Lead in Epidemiology and Statistics, Michigan Medicine, Ann Arbor,  
10     Michigan, USA

11     <sup>3</sup> Volunteer collaborators with the Institute of Health Metrics and Evaluation, Seattle,  
12     Washington, USA

13     Correspondence to: David K Cundiff [davidkcundiff@gmail.com](mailto:davidkcundiff@gmail.com) Phone: 01-562-438-8805

14     Word count: abstract=399, text=3603

15

16 **Abstract**

17 **Objectives** (1) Derive a worldwide body mass index (BMI) multiple regression formula (BMI  
18 formula), (2) Quantify the percent weights attributable to dietary and other risk factors from this  
19 BMI formula, and (3) Test relevant dietary guidelines and diets using the BMI formula generated  
20 BMI estimates

21 **Design** BMI and risk factor cohort data from 1990-2017 from the Institute of Health Metrics and  
22 Evaluation (IHME) were formatted and population-weighted. We empirically explored the  
23 univariate and multiple regression correlations of risk factors with BMI to maximize BMI  
24 formula functionality.

25 **Setting** Worldwide

26 **Ecological cohort data** Over 12,000 Global Burden of Disease (GBD) risk factor surveys of  
27 people 15-69 years old from 195 countries analysed and synthesised into representative cohort  
28 risk factor values by staff and volunteer collaborators with the IHME

29 **Main outcome measures** Performance of a worldwide BMI formula when tested with eight  
30 Bradford Hill causality criteria, each scored with 0-5 scale: 0=negative to 5=very strong support  
31 (40 possible score)

32 **Results** In the BMI formula derived, all foods were expressed in kilocalories/day (kcal/day), and  
33 all risk factor coefficients were adjusted to equate with their percent weight impacts on BMI.  
34 BMI formula =0.29\*processed meat +11.87\*red meat +0.02\*fish +3.74\*milk +11.09\*poultry  
35 +5.46\*eggs +1.95\*alcohol +6.29\*sugary beverages +0.29\*corn +3.53\*potatoes +2.71 \*  
36 saturated fatty acids+ 0.64\*polyunsaturated fatty acids+0.06\*trans fatty acids-0.37\*fruit -  
37 0.52\*vegetables -0.03\*nuts and seeds -0.12 \*whole grains -0.47\*legumes-8.26\*rice -18\*sweet  
38 potatoes -9.93\*physical activity (METs/week) +5.78\*total kcals/day available-4.13\*child

39 underweight+0.92\*discontinued breast feeding. BMI increasing foods have + signs in the BMI  
40 formula and BMI decreasing foods have - signs. Bradford Hill causality criteria test scores (0-5):  
41 (1) strength=5, (2) consistency=5, (3) dose-response=5, (4) temporality=5, (5) analogy=4, (6)  
42 plausibility=5, (7) experimentation=5 and (8) coherence=5. Total=39/40. Based on the USA  
43 BMI trend data, the mean adult BMI in 1990 was 25.45, is projected to be 28.13 in 2020, and  
44 31.81 in 2050. BMI formula based mean BMI estimates included the following: Dietary  
45 Guidelines for Americans=26.34, USA with 50% reduction of BMI increasing food intake  
46 =23.34, USA with 25% reduction of BMI increasing food intake and increasing physical activity  
47 by running at 6 mph for 1 hour/day on average=23.67, vegetarian diet=22.54, low carbohydrate,  
48 high fat diet=31.76.

49 **Conclusions** Eight relevant Bradford Hill causality criteria strongly supported that the BMI  
50 formula derived was causally related to mean BMIs of worldwide cohorts, subgroups, and  
51 individual risk factor patterns. The statistical analysis methodology introduced could inform  
52 individual, clinical, and public health strategies regarding overweight/obesity  
53 prevention/treatment and other health outcomes.

54

## 55 **Introduction**

56 The scientific validity of the Dietary Guidelines for Americans for 2015-2020 was challenged by  
57 Journalist Nina Teicholz in the *BMJ*.<sup>1</sup> The Center for Science in the Public Interest called for the  
58 *BMJ* to retract the article. The peer reviewers selected to adjudicate the far reaching dispute  
59 concluded that, “Teicholz’s criticisms of the methods used by Dietary Guidelines for Americans  
60 Committee are within the realm of scientific debate.”<sup>2</sup> Regarding scientific study of treatments of  
61 overweight/obesity, *JAMA* published a representative randomised trial comparing a low fat diet  
62 with a low carbohydrate diet. It reported no difference in the very modest weight loss achieved at  
63 one year.<sup>3</sup> This suggests that current short term dietary intervention trials (< 5 years) are  
64 meaningless in determining the long-term relationship of diet (> 20 years) with  
65 overweight/obesity.

66  
67 Influential Stanford University meta researcher, Dr. John Ioannidis, called for radical reform of  
68 all nutritional epidemiology methodologies used to influence food/agricultural policies and to  
69 produce dietary guidelines for clinicians and the public.<sup>4</sup> Currently, no methodology for relating  
70 body mass index (BMI) long-term or BMI change/year to food intake and physical activity has  
71 been generally accepted as rigorous, replicable, and scientifically valid. This study analysing  
72 worldwide data for dietary and other risk factors for BMI attempts to answer Dr. Ioannidis’ call  
73 for a more rigorous and reliable nutritional epidemiology methodology to base public health  
74 policies and individual dietary guidance.

75  
76 The first objective of this analysis was to derive a multiple regression risk factor formula using  
77 worldwide ecological data on BMIs of male and female cohorts (dependent variable) and dietary

78 and other risk factors (independent variables). Secondly, we used Bradford Hill causality criteria  
79 to test the BMI formula containing worldwide diet and other risk factors. Satisfying Bradford  
80 Hill causality criteria is considered validating in epidemiological research.<sup>5</sup> Third we wanted to  
81 apply the BMI formula to assorted diet and other risk factor patterns to derive mean BMI  
82 estimates associated with long-term (>20 years) following of those diet and other risk factor  
83 patterns. We only hypothesised that the objectives were achievable.

84

85

86

## 87 **Methods**

88 As volunteer collaborators with the Institute of Health Metrics and Evaluation (IHME), we  
89 received raw Global Burden of Disease (GBD) ecological data ( $\approx 1.4$  Gigabytes) on mean BMIs  
90 of male and female cohorts 15-49 years old and 50-69 years old from each year 1990-2017 from  
91 195 countries and 365 subnational locations ( $n=1\,120$  cohorts). We also utilised GBD data on  
92 exposures to 32 risk factors and covariates potentially related to BMI. IHME dietary covariate  
93 data originally came from Food and Agriculture Organization surveys of animal and plant food  
94 commodities available percapita—as opposed to consumed per capita—in countries worldwide.<sup>6</sup>  
95 Food risk factors came as g/day consumed percapita. Other variables were utilised as part of  
96 deriving the BMI formula and testing the BMI formula according to the Bradford Hill causality  
97 criteria: physical activity (METs/day), kilocalories per day available percapita (kcal/day, a  
98 covariate), severe child underweight (2 SD below the mean weight for age), and discontinued  
99 breast feeding before 6 months. Other available variables tested included socio-demographic  
100 index, LDL-cholesterol, fasting plasma glucose and, systolic blood pressure. Supplementary  
101 Table 1 lists the relevant GBD risk factors, covariates, and other available variables with  
102 definitions of those risk factor exposures.<sup>7</sup>  
103  
104 GBD worldwide citations of over 12,000 surveys constituting ecological data inputs for this  
105 analysis are in Appendix 1.<sup>6,8</sup> The main characteristics of IHME GBD data sources for BMI and  
106 all risk factor values have been published by IHME GBD data researchers and discussed  
107 elsewhere.<sup>9-11</sup> These included detailed descriptions of categories of input data, potentially  
108 important biases, and methodologies of analysis. We did not clean or pre-process any of the  
109 GBD data. GBD cohort risk factor and BMI data from the IHME had no missing records.

110 Because this was a post hoc analysis and the GBD data for the study came from IHME, no ethics  
111 committee approval or institutional review board review was needed for this statistical analysis.

112 The raw data for this analysis may be obtained by volunteer researchers collaborating with  
113 IHME.<sup>12</sup>

114  
115 IHME made available GBD BMI, risk factor, and covariate exposure data for each year from  
116 1990-2017 for male and female cohorts from ages 15-49 years old and from 50-69 years old. To  
117 maximally utilise the available data, we averaged the values for ages 15-49 years old together  
118 with 50-69 years old for BMI and for each risk factor exposure for each male and female cohort  
119 for each year. Finally, for each male and female cohort, data from all 28 years (1990-2017) on  
120 mean BMI and on each of the risk factor exposures were averaged using the computer software  
121 program R.

122  
123 To weigh the country and subnational data according to population, internet searches (mostly  
124 Wikipedia) yielded the most recent population estimates for countries and subnational states,  
125 provinces, and regions. World population data from the World Bank and the Organisation for  
126 Economic Co-operation and Development could not be used because they did not include all 195  
127 countries or any subnational data.

128  
129 Using the above described formatted dataset of risk factors, covariates, and BMIs, a software  
130 program in R generated a population-weighted analysis dataset. Each male or female cohort in  
131 the population-weighted analysis dataset represented approximately 1 million people (range: <  
132 100,000 to 1.5 million). The analysis dataset had n=7886 cohorts (rows of data), half male and

133 half female, representative of over seven billion people. For example, India with about 1.234  
134 billion people had 617 rows of the same data for males and 617 rows for females. Maldives, with  
135 about 445,000 people, had a single row of data for males and another for females. Without  
136 population-weighting the data, cohorts in India and Maldives each would have had one row in  
137 the analysis dataset, invalidating the analysis results.

138  
139 This report follows the STrengthening the Reporting of OBservational studies in Epidemiology  
140 (STROBE) guidelines for reporting global health estimates.<sup>13</sup>

141  
142 Supplementary Table 2 details how omega-3 fatty acid g/day was converted to fish g/day using  
143 data on the omega-3 fatty acid content of frequently eaten fish from the National Institutes of  
144 Health Office of Dietary Supplements (USA).<sup>14</sup> As shown in Supplementary Table 3, we  
145 converted all of the animal and plant food data, including alcohol and sugary beverage  
146 consumption, from g/day to kcal/day. For the g to kcal conversions, we used the Nutritionix track  
147 app,<sup>15</sup> which tracks types and quantities of foods consumed. Saturated fatty acids risk factor (0-1  
148 portion of the entire diet) was not available with GBD data from 2017, so GBD saturated fatty  
149 acids risk factor data from 2016 was used. Polyunsaturated fatty acid and trans fatty acid GBD  
150 risk factor data from 2017 (0-1 portion of the entire diet) was also utilised. These fatty acid data  
151 were converted to kcal/day by multiplying by the kcal/day available for each cohort.

152

## 153 **Statistical methods**

154 To determine the strengths of the risk factor correlations with mean BMIs of population  
155 weighted worldwide cohorts (7886 cohorts) or subgroups of cohorts (e.g., continents, socio-



156 demographic quartiles, etc.), we utilised Pearson correlation coefficients:  $r$ , 95% confidence  
157 intervals (95% CIs), and  $P$  values.

158

159 In this first of its kind, post hoc, exploratory analysis; the methodology was determined as we  
160 proceeded by experimenting with strategies to optimise the functioning of the BMI formula  
161 derived. We sought to derive a BMI multiple regression formula from worldwide data with the  
162 following characteristics:

163

- 164 1. including as many as possible of the available animal and plant food variables,
- 165 2. including physical activity and other plausibly informative available ecological variables,  
166 and
- 167 3. combining dietary variables if appropriate to utilise more variables and improve BMI  
168 formula strength (i.e.,  $R^2$  with BMI) and consistency at predicting subgroup mean BMIs.

169

170 Appendix 2 further details the statistical methodology and explains the use of Bradford Hill  
171 causality criteria to assess whether the worldwide BMI was causally related to the risk factors in  
172 the BMI formula. Briefly, we tested the BMI formula output with the Bradford Hill causality  
173 criteria (1) strength, (2) consistency, (3) dose response, (4) temporality, (5) analogy, (6)  
174 plausibility, (7) experimentation, and (8) coherence. For each criterion, we used a 0-5 scale to  
175 assess the magnitude of support of the BMI formula output being causally related to the BMIs  
176 worldwide (0=no support of causality to 5=very strong support of causality).

177

178 In determining the variables to include and exclude in worldwide BMI formula, we set the  
179 statistical threshold for a variable to enter and to remain in the formula at  $P < 0.25$ . We used  
180 SAS and SAS Studio statistical software 9.4 (SAS Institute, Cary, NC) for the data analysis.

## 181 **Results**

182 Table 1 shows the basic statistics and univariate correlations of mean BMI with dietary and other  
183 risk factors and with the BMI formula derived from worldwide cohorts. Table 2 shows the  
184 univariate correlations of each of the 24 BMI formula risk factors with each other. All six animal  
185 foods (processed meat, red meat, fish, milk, poultry, and eggs), alcohol, sugary beverages, corn  
186 availability, potato availability, saturated fatty acids, polyunsaturated fatty acids, and trans fatty  
187 acids all positively correlated with BMI. Table 2 shows that corn availability (kcal/day percapita,  
188 a covariate) correlated moderately strongly with sugary beverages ( $r=0.419$ , 95% CI 0.400 to  
189 0.437,  $P<0.0001$ ), suggesting that high fructose corn syrup may account for the positive  
190 correlation with BMI. Potato availability (kcal/day percapita, a covariate), which positively  
191 correlated with BMI, included  $\geq 50\%$  highly processed potato products worldwide according to  
192 the International Potato Center.<sup>16</sup> Four starchy plant foods (whole grains, legumes, rice, and  
193 sweet potatoes) all negatively correlated with BMI.

194

195 The strong positive correlations of fruits, vegetables, and nuts and seeds with BMI were  
196 unexpected since nutritional literature broadly supports these foods as non-obesogenic. It  
197 suggested possible multicollinearity (when an independent variable is highly correlated with one  
198 or more known or unknown other independent variables). Supplementary Table 4 demonstrates  
199 the multicollinearity of fruits, vegetables, and nuts and seeds with BMI increasing foods:

200

- 201 • BMI increasing foods (animal foods + alcohol + sugary beverages + corn + potatoes) as a  
202 group were very strongly correlated with BMI ( $r= 0.597$ , 95% CI 0.583 to 0.611,  $P<$   
203 0.0001).

- 204 • Fruits, vegetables, nuts and seeds grouped together were strongly positively correlated  
205 with BMI ( $r= 0.655$ , 95% CI 0.642 to 0.677,  $P< 0.0001$ ) but also with BMI increasing  
206 foods ( $r= 0.323$ , 95% CI 0.304 to 0.343,  $P< 0.0001$ ).

207 Supplementary Table 4 also shows that the top sociodemographic index (SDI) cohort quartile's  
208 mean BMI was about 3.6 BMI units higher than the three lowest SDI quartiles (24.54 versus  
209 20.88), meaning that the more developed countries had much higher mean BMIs. BMI increasing  
210 foods in the top SDI quartile exceeded intake in the three lowest quartiles by 58% (905/kcal/day /  
211 571 kcal/day=1.58). Fruits, vegetables, and nuts and seeds in the top SDI quartile exceeded  
212 intake in the three lower quartiles by 1.9 to 1 (199/kcal/day / 106 kcal/day=1.88). Because of the  
213 multicollinearities of fruits, vegetables and nuts and seeds with the 10 BMI increasing foods, we  
214 grouped fruits, vegetables and nuts and seeds with BMI decreasing foods (including whole  
215 grains, legumes, rice, and sweet potatoes) in a combination variable used to derive the BMI  
216 formula, gives the coefficients of risk factors equated to their percent weights (shown in  
217 Supplementary Table 5):

218  
219 BMI formula =0.29\*processed meat +11.87\*red meat +0.02\*fish +3.74\*milk  
220 +11.09\*poultry +5.46\*eggs +1.95\*alcohol +6.29\*sugary beverages +0.29\*corn  
221 +3.53\*potatoes +2.71 \* saturated fatty acids+ 0.64\*polyunsaturated fatty  
222 acids+0.06\*trans fatty acids-0.37\*fruit -0.52\*vegetables -0.03\*nuts and seeds -  
223 0.12 \*whole grains -0.47\*legumes-8.26\*rice-0.18\*sweet potatoes -9.93\*physical  
224 activity (METs/week) +5.78\*total kcals/day available-4.13\*child  
225 underweight+0.92\*discontinued breast feeding. Percent weights of risk factors  
226 were equated to risk factor coefficients. Total percent weights=78.64. (BMI

227 formula  $R^2=0.7864$ ,  $r=0.887$ , 95% CI 0.882 to 0.891,  $P<0.0001$ , + signs mean  
228 BMI increasing and - signs mean BMI decreasing).

229  
230 As detailed in the methods and Appendix 2, the standardised BMI formula coefficients of the  
231 dietary and other risk factors were all adjusted to equate to the percent weights of risk factors in  
232 the BMI formula.

233  
234 As shown in Supplementary Table 5, the 13 BMI increasing foods and seven BMI decreasing  
235 foods underwent three adjustments: (1) multiplied times their mean kcal/day values (Column C),  
236 (2) multiplied times their  $R^2$  values in univariate correlation with BMI (Column E), and (3)  
237 multiplied times the ratio of the mean kcal/day of the second, third, and fourth sociodemographic  
238 index (SDI) quartiles divided by the mean kcal/day of the first SDI quartile (Column G). Table 3  
239 demonstrates that these adjustments improved the consistency of the BMI formula as measured  
240 by the closeness of fit of the multiple regression derived BMI formula outputs with the mean  
241 BMIs of 37 subgroups of the worldwide data.

## 242

### 243 **BMI formula output analysed by Bradford Hill causality criteria**

244 Eight Bradford Hill causality criteria tested the functionality of the BMI formula. With the  
245 methodology detailed in Appendix 2, we assessed the relationship of the worldwide BMI  
246 formula output versus the mean BMI as follows:

- 247
- 248 **1.** Strength=5—The correlation coefficient of the BMI formula regressed with BMI:  $r=$   
249  $0.887$  (95% CI: 0.882 to 0.891),  $P<0.0001$ .

- 250       **2.** Consistency score=5— Table 3 shows the average absolute differences between subgroup  
251       mean BMIs and BMI formula estimates of the BMI formula compared with two other  
252       variations of the BMI formula. The BMI formula with fruits, vegetables, and nuts and  
253       seeds grouped with BMI decreasing foods as negatively correlated with BMI had a  
254       slightly closer fit than a comparison BMI formula with fruits, vegetables, and nuts and  
255       seeds grouped with BMI increasing foods positively correlated with BMI (average BMI -  
256       BMI formula estimate (absolute difference): 0.249 versus 0.255 BMI units). Without the  
257       three adjustments to each of the food variables, the average BMI - BMI formula estimate  
258       absolute difference was 0.368 BMI units.
- 259       **3.** Dose-response (Biological gradient) score=5—Table 3 shows that the mean of the BMI  
260       absolute differences between the BMI formula estimates and mean BMIs and in the four  
261       dose-response quartiles was 0.302 BMI units.
- 262       **4.** Temporality score=5—a multiple regression with the worldwide BMI trend 1990-2007  
263       (dependent variable) versus the risk factor trends (independent variables) generated a  
264       BMI trend formula versus risk factor BMI trends:  $r = 0.615$ , (95% CI: 0.601 to 0.628),  
265        $P < 0.0001$ ). Fifteen out of 24 risk factor trends contributed to the BMI trend formula. The  
266       derivation of standardised BMI trend versus risk factors trends formula with sign  
267       concordant coefficients adjusted to equal the percent weights of the significant risk  
268       factors shown in Supplementary Table 7 was as follows:
- 269       BMI trend formula= $4.84 * \text{Red meat} + 0.63 * \text{Milk} + 4.61 * \text{Poultry} + 2.62 * \text{Eggs} + 3.91$   
270        $* \text{Alcohol} + 2.69 * \text{Sugary beverages} + 0.40 * \text{corn} + 3.60 * \text{Potatoes} + 3.90 * \text{PUFA} -$   
271        $0.65 * \text{Legumes} - 3.08 * \text{Rice} - 0.80 * \text{Sweet potatoes} + 6.06 * \text{kcal available}$  (total  
272       percent weight 37.79,  $R^2 = 0.3779$ ).
- 273

- 274       **5.** Analogy score=4—Systolic blood pressure had 15/24 risk factors concordant in  
275       sign with BMI. SBP correlated weakly with the BMI formula ( $r=0.024$ , 95% CI  
276       0.002 to 0.046,  $P=0.0361$ ). The low density lipoprotein cholesterol (LDL-C) and  
277       the fasting plasma glucose (FPG) formulas had 23/24 and 21/24 risk factors  
278       concordant in sign with the BMI formula, respectively. The LDL-C and the FPG  
279       were both strongly correlated with BMI ( $r=0.757$ , 95% CI 0.747 to 0.766,  $P <$   
280       0.0001 and  $r=0.565$ , 95% CI 0.550 to 0.580,  $P < 0.0001$ , respectively). They  
281       were also strongly correlated with the BMI formula ( $r=0.757$ , 95% CI 0.747 to  
282       0.766,  $P < 0.0001$  and  $r=0.581$ , 95% CI 0.566 to 0.595),  $P < 0.0001$ , respectively.
- 283       **6.** Plausibility: Score=5—Based on systematic medical literature reviews, physical activity  
284       inversely correlated with BMI<sup>17</sup> and BMI directly correlated with intakes of sugar,<sup>18</sup>  
285       alcohol,<sup>19</sup> and animal foods.<sup>20</sup> The relationship of adult BMI with early childhood severe  
286       underweight has not been reported worldwide. Since people in poor countries have less  
287       animal foods and alcohol and more physical exercise than in developed countries, it is  
288       plausible that childhood severe underweight positively correlates with lower BMI in  
289       adulthood.
- 290       **7.** Experiment: Score=5—Table 4 demonstrates cross validation of the BMI formula with a  
291       very high degree of reproducibility in the percent weight distributions from 20 randomly  
292       selected subgroups of the dataset ( $n=100$  for each, which are shown in Supplementary  
293       Table 7).
- 294       **8.** Coherence: Score=5—As evidenced by the near perfect score 34/35 on the first seven  
295       criteria, the Bradford Hill causality criteria overall were strongly supportive that the

296 worldwide BMI formula accurately modeled the 24 risk factors that led to increased and  
297 decreased BMI—total causality criteria score=39/40.

298  
299 Relative to other countries, the USA had one of the world’s highest levels of kcal/day of BMI  
300 increasing foods (exclusive of fatty acids), 1015 kcal/day and below average consumption of  
301 BMI decreasing foods, 326 kcal/day, corresponding to an average adult BMI=26.66. Based on  
302 the USA BMI trend data, the mean adult BMI in 1990 was 25.45 and is projected to be 28.13 in  
303 2020, and 30.81 in 2050. Table 5 shows BMI formula estimates for various relevant patterns of  
304 diet and/or other BMI formula risk factors. Following the Dietary Guidelines for Americans  
305 2015 -2020 would result in a mean adult BMI of 26.34, which is almost the mean USA adult  
306 BMI from 1990 - 2017 (26.66). A major increase in exercise on a regular basis alone would  
307 decrease the BMI formula estimated mean long term BMI. In addition to the current mean level  
308 of physical activity (3853 METs/week), running two hours/day on average at 6 miles per hour  
309 (8400 METs/week)<sup>21</sup> would reduce the estimated mean BMI by 2.68 BMI units to 23.98.



## 310 **Discussion**

311 The eight Bradford Hill criteria used in this analysis of long term worldwide data all support that  
312 the BMI formula is causally related to adult BMI.

313

314 Short of extreme and unrealistic for most people increases in exercise to control weight, dietary  
315 change from the USA current dietary patterns or even the USA dietary guidelines recommended  
316 diet would be required to reach the normal range for BMI ( $BMI \geq 18.5$  and  $BMI < 25$ ). For  
317 example, shifting 50% of kcal/day from BMI increasing foods to BMI decreasing foods equates  
318 to a BMI formula estimate=23.26 BMI units over the long term. While following a low  
319 carbohydrate, high fat diet has been demonstrated to cause modest short term weight loss in  
320 obese people,<sup>22</sup> the BMI formula projects that the long-term effect (> 20 years) would be obesity  
321 (projected mean BMI=31.76).

322

323 The perhaps counterintuitive findings that fruits, vegetables, and nuts and seeds were positively  
324 correlated with BMI ( $r=0.655$ , 95% CI 0.642 to 0.677,  $P < 0.0001$ ) may be largely explained by  
325 the multicollinearity between fruits, vegetables, and nuts and seeds and BMI increasing foods  
326 ( $r=0.323$ , 95% CI 0.304 to 0.343,  $P < 0.0001$ , Table 2). The high cost of fruits, vegetables, and  
327 nuts and seeds may account for much of this multicollinearity both worldwide and within  
328 wealthy countries that have high economic inequality levels like the USA. A systematic review  
329 of the literature on food cost relative to nutrient quality found that the median costs of starches  
330 (€0.14/100 kcal) was quite low relative to fruits and vegetables (€0.82/100 kcal), meat/eggs/fish  
331 (€0.64/100 kcal), fresh dairy (€0.32/100 kcal), and nuts (€0.25/100 kcal).<sup>23</sup>

332

333 The findings in this study, particularly those in Table 5, should influence government food policy  
334 decisions. The Supplemental Nutrition Assistance Program (SNAP—formerly Food Stamps)  
335 spends an estimated 22.6% of its \$73 billion/year budget<sup>26</sup> on payments to low-income  
336 Americans for “sweetened beverages, prepared desserts, salty snacks, candy, and sugar.”<sup>27</sup>  
337 Additionally, the US Department of Agriculture (USDA) subsidises crops that go primarily for  
338 animal feed or that are processed into sugars while not subsidizing fruits and vegetables.<sup>24</sup> While  
339 the USDA recognises the relatively low intake of fruits and vegetables in the USA and sponsors  
340 a publicity campaign to increase fruits and vegetables,<sup>25</sup> USDA expenditures should promote  
341 reduced prices of BMI decreasing foods and increased prices of BMI increasing foods.

342  
343 The strong correlation of discontinuation of breastfeeding with BMI ( $r=0.802$ , 95% CI 0.794 to  
344 0.810,  $P<0.0001$ ) was in accord with a meta-analysis of breast feeding related to subsequent  
345 childhood and adult BMI by Jeanne Stolzer.<sup>26</sup> However, the estimated benefit in reducing adult  
346 BMI of breastfeeding in this study was very modest (0.19 BMI unit, see Table 5). Breastfeeding  
347 for at least six months is recommended by the American Academy of Pediatrics<sup>27,28</sup> and the  
348 National Institute of Clinical Excellence.<sup>29</sup>

349

## 350 **Limitations**

351 The GBD data on animal and plant foods were not comprehensive and comprised only 1199  
352 kcal/day on average. Subnational data were available on only four countries. Because the data  
353 formatting and statistical methodology were new, this was necessarily a post hoc analysis and no  
354 pre-analysis protocol was possible. As detailed in the Foresight Report on obesity,<sup>30</sup> obesity is  
355 affected by a complex system of interacting factors besides diet, physical activity, and breast

356 feeding. So genes,<sup>31</sup> gut microbiome,<sup>32</sup> ultra processing of food,<sup>33,34</sup> and other influences on BMI  
357 were outside of the purview of this analysis.

358

### 359 **Generalisability**

360 Given the strength and consistency of the relationship of the BMI formula in modeling BMI  
361 (SDI quartiles, continents, and subnationals, etc., see Tables 3 and 5), the findings should be  
362 generalisable to people all over the world.

363 **Conclusion**

364 Eight Bradford Hill causality criteria strongly supported that the worldwide obesity epidemic is  
365 causally related to the 24 risk factors in proportion to their coefficients in the BMI formula. The  
366 findings in this study should be considered by health policymakers drafting dietary guidelines for  
367 healthy weight management. While this study deals only with dietary and other risk factors for  
368 BMI (overweight/obesity), the methodology introduced could easily apply to estimating percent  
369 weights of multiple dietary and other risk factors that pertain to dozens of non communicable  
370 diseases, for which the IHME have GBD data.

371

372

373

374  
375

**Table 1. BMI risk factor basic statistics and Bradford Hill criterion strength**

| <b>BMI and risk factors:<br/>n=7886</b>             | <b>Mean</b> | <b>Std<br/>Dev</b> | <b>Mini-<br/>mum</b> | <b>Maxi-<br/>mum</b> | <b>r</b> | <b>95% CI</b>    | <b>P</b> | <b>R<sup>2</sup></b> |
|-----------------------------------------------------|-------------|--------------------|----------------------|----------------------|----------|------------------|----------|----------------------|
| <b>BMI kg/M2</b>                                    | 21.79       | 2.31               | 17.95                | 29.39                |          |                  |          |                      |
| <b>BMI formula</b>                                  | 21.79       | 2.31               | 18.15                | 30.32                | 0.887    | 0.882 to 0.891   | <.0001   | 0.791                |
| <b>Processed kcal/day</b>                           | 5.49        | 9.94               | 0.20                 | 68.8                 | 0.604    | 0.590 to 0.618   | <.0001   | 0.365                |
| <b>Red meat kcal/day</b>                            | 50.70       | 45.45              | 3.21                 | 235.9                | 0.662    | 0.649 to 0.674   | <.0001   | 0.438                |
| <b>Fish kcal/day</b>                                | 10.01       | 36.43              | 0.40                 | 370.4                | 0.103    | 0.081 to 0.124   | <.0001   | 0.011                |
| <b>Milk kcal/day</b>                                | 25.37       | 27.39              | 1.06                 | 146.8                | 0.684    | 0.672 to 0.696   | <.0001   | 0.468                |
| <b>Poultry kcal/day avail</b>                       | 45.06       | 51.03              | 1.06                 | 411.9                | 0.813    | 0.805 to 0.820   | <.0001   | 0.661                |
| <b>Eggs kcal/day avail</b>                          | 19.47       | 14.76              | 0.79                 | 69.6                 | 0.688    | 0.676 to 0.699   | <.0001   | 0.473                |
| <b>Alcohol kcal/day</b>                             | 81.71       | 58.06              | 4.25                 | 430                  | 0.166    | 0.145 to 0.188   | <.0001   | 0.028                |
| <b>Sugary beverages kcal/day</b>                    | 297.65      | 152.33             | 73                   | 1472                 | 0.119    | 0.097 to 0.141   | <.0001   | 0.014                |
| <b>Corn kcal/day avail</b>                          | 34.67       | 48.16              | 0.16                 | 305.2                | 0.073    | 0.051 to 0.095   | <.0001   | 0.005                |
| <b>Potatoes kcal/day avail</b>                      | 84.16       | 74.43              | 3.07                 | 533.9                | 0.211    | 0.189 to 0.232   | <.0001   | 0.044                |
| <b>Saturated FA % kcal<br/>available</b>            | 191.27      | 64.49              | 70.79                | 481.1                | 0.710    | 0.699 to 0.721   | <.0001   | 0.504                |
| <b>Polyunsaturated fatty acids<br/>kcal %</b>       | 82.24       | 74.98              | 2.93                 | 381.31               | 0.737    | 0.727 to 0.747   | <.0001   | 0.543                |
| <b>Trans fatty acids % kcal</b>                     | 13.4        | 13.82              | 1.99                 | 77.76                | 0.488    | 0.471 to 0.504   | <.0001   | 0.238                |
| <b>Fruits kcal/day</b>                              | 40.39       | 22.59              | 3.58                 | 161.4                | 0.622    | 0.609 to 0.636   | <.0001   | 0.387                |
| <b>Vegetables kcal/day</b>                          | 80.14       | 43.36              | 9.48                 | 304.2                | 0.520    | 0.503 to 0.536   | <.0001   | 0.270                |
| <b>Nuts and seeds kcal/day</b>                      | 8.51        | 8.44               | 0.05                 | 103.0                | 0.486    | 0.469 to 0.503   | <.0001   | 0.237                |
| <b>Whole grains kcal/day</b>                        | 55.65       | 30.85              | 1.14                 | 235.1                | -0.201   | -0.222 to -0.179 | <.0001   | 0.040                |
| <b>Legumes kcal/day</b>                             | 51.66       | 32.16              | 0.51                 | 194.7                | -0.384   | -0.403 to -0.365 | <.0001   | 0.148                |
| <b>Rice kcal/day avail</b>                          | 141.23      | 116.38             | 1.42                 | 461.8                | -0.561   | -0.576 to -0.545 | <.0001   | 0.314                |
| <b>Sweet potatoes kcal/day<br/>avail</b>            | 22.67       | 35.88              | 0.02                 | 364.7                | -0.152   | -0.173 to -0.130 | <.0001   | 0.023                |
| <b>Physical activity METs</b>                       | 4709        | 1367               | 1609                 | 7669                 | -0.445   | -0.462 to -0.427 | <.0001   | 0.198                |
| <b>Kcal available/day</b>                           | 2579        | 421                | 1579                 | 3898                 | 0.843    | 0.837 to 0.850   | <.0001   | 0.711                |
| <b>Child/infant underweight</b>                     | 0.19        | 0.17               | 0.00                 | 0.53                 | -0.794   | -0.802 to -0.786 | <.0001   | 0.631                |
| <b>Discontinued breast<br/>feeding&lt; 6 months</b> | 0.12        | 0.06               | 0.02                 | 0.24                 | 0.802    | 0.794 to 0.810   | <.0001   | 0.644                |
| <b>Sodium g/day</b>                                 | 4.45        | 2.33               | 1.33                 | 9.21                 | -0.019   | -0.041 to -0.003 | 0.099    | 0.000                |
| <b>Calcium g/day</b>                                | 0.3         | 0.18               | 0.08                 | 1.04                 | 0.771    | 0.762 to 0.779   | <.0001   | 0.594                |
| <b>Dietary fiber g/day</b>                          | 9.22        | 3.15               | 2.72                 | 22.68                | 0.310    | 0.290 to 0.330   | <.0001   | 0.096                |
| <b>Sugar available kcal/day</b>                     | 447.1       | 283.8              | 48.3                 | 1249                 | 0.423    | 0.405 to 0.441   | <.0001   | 0.179                |
| <b>Fasting plasma glucose<br/>mmol/dl</b>           | 4.31        | 0.35               | 3.32                 | 5.58                 | 0.565    | 0.550 to 0.580   | <.0001   | 0.32                 |
| <b>Systolic BP mm/Hg</b>                            | 133.9       | 4.33               | 123.4                | 147.9                | 0.087    | 0.065 to 0.109   | <.0001   | 0.008                |
| <b>LDL cholesterol mmol/dl</b>                      | 2.36        | 0.4                | 1.27                 | 3.25                 | 0.757    | 0.747 to 0.766   | <.0001   | 0.573                |
| <b>Socio-demographic index</b>                      | 0.54        | 0.17               | 0.11                 | 0.9                  | 0.738    | 0.728 to 0.748   | <.0001   | 0.544                |

376  
377

378 **Table 2. Correlations between the risk factors that are in Table 1**

| Variables (foods in kcal/day)               | Process ed meat | Red meat | Fish   | Milk   | Poultry | Eggs   | Alcohol |
|---------------------------------------------|-----------------|----------|--------|--------|---------|--------|---------|
| <b>Processed meat</b>                       | 1.000           |          |        |        |         |        |         |
| <b>Red meat</b>                             | 0.656           | 1.000    |        |        |         |        |         |
| <b>Fish</b>                                 | 0.281           | 0.118    | 1.000  |        |         |        |         |
| <b>Milk</b>                                 | 0.763           | 0.682    | 0.109  | 1.000  |         |        |         |
| <b>Poultry</b>                              | 0.675           | 0.670    | 0.162  | 0.684  | 1.000   |        |         |
| <b>Eggs</b>                                 | 0.574           | 0.786    | 0.392  | 0.532  | 0.633   | 1.000  |         |
| <b>Alcohol</b>                              | 0.592           | 0.478    | 0.292  | 0.402  | 0.372   | 0.352  | 1.000   |
| <b>Sugary beverages</b>                     | -0.118          | 0.037    | -0.163 | 0.059  | 0.126   | 0.014  | -0.098  |
| <b>Corn</b>                                 | -0.052          | -0.144   | -0.018 | -0.108 | 0.008   | -0.100 | -0.108  |
| <b>Potatoes</b>                             | 0.160           | 0.124    | -0.058 | 0.202  | 0.104   | 0.032  | -0.007  |
| <b>Saturated fatty acids</b>                | 0.633           | 0.709    | 0.039  | 0.772  | 0.709   | 0.601  | 0.304   |
| <b>Poly unsaturated fatty acids</b>         | 0.711           | 0.699    | 0.162  | 0.691  | 0.844   | 0.635  | 0.400   |
| <b>Trans fatty acids</b>                    | 0.479           | 0.203    | -0.006 | 0.445  | 0.465   | 0.217  | 0.174   |
| <b>Fruits</b>                               | 0.391           | 0.380    | 0.099  | 0.499  | 0.613   | 0.374  | 0.075   |
| <b>Vegetables</b>                           | 0.308           | 0.392    | 0.271  | 0.362  | 0.360   | 0.519  | 0.209   |
| <b>Nuts and seeds</b>                       | 0.520           | 0.399    | 0.073  | 0.590  | 0.519   | 0.344  | 0.253   |
| <b>Whole grains</b>                         | -0.022          | -0.111   | 0.091  | -0.250 | -0.023  | -0.076 | 0.065   |
| <b>Legumes</b>                              | -0.199          | -0.404   | 0.061  | -0.197 | -0.222  | -0.418 | 0.133   |
| <b>Rice</b>                                 | -0.396          | -0.357   | -0.071 | -0.568 | -0.396  | -0.277 | -0.139  |
| <b>Sweet potatoes</b>                       | -0.197          | 0.000    | -0.075 | -0.395 | -0.242  | 0.045  | -0.068  |
| <b>Physical activity METs</b>               | -0.215          | -0.072   | -0.163 | -0.431 | -0.397  | -0.119 | 0.097   |
| <b>Kcal /day available</b>                  | 0.602           | 0.649    | 0.098  | 0.775  | 0.754   | 0.644  | 0.231   |
| <b>Child/infant 2SD underweight</b>         | -0.416          | -0.737   | -0.189 | -0.409 | -0.618  | -0.804 | -0.141  |
| <b>Discontinued breast feeding &lt;6 mo</b> | 0.583           | 0.812    | 0.219  | 0.639  | 0.727   | 0.847  | 0.307   |

379  
380  
381  
382

**Table 2. Correlations between the risk factors that are in Table 1 (continued)**

| Variables (foods in kcal/day)               | Sugary beverages | Corn   | Potatoes | Fruits | Vegetables | Nuts and seeds | Whole grains |
|---------------------------------------------|------------------|--------|----------|--------|------------|----------------|--------------|
| <b>Corn</b>                                 | 0.419            | 1.000  |          |        |            |                |              |
| <b>Potatoes</b>                             | -0.026           | 0.158  | 1.000    |        |            |                |              |
| <b>Fruits</b>                               | 0.189            | 0.100  | 0.243    | 1.000  |            |                |              |
| <b>Vegetables</b>                           | -0.173           | -0.203 | -0.044   | 0.394  | 1.000      |                |              |
| <b>Nuts and seeds</b>                       | -0.154           | -0.114 | 0.188    | 0.586  | 0.556      | 1.000          |              |
| <b>Whole grains</b>                         | 0.204            | 0.428  | -0.058   | 0.012  | -0.346     | -0.208         | 1.000        |
| <b>Legumes</b>                              | 0.199            | 0.269  | 0.018    | -0.032 | -0.160     | -0.028         | 0.100        |
| <b>Rice</b>                                 | -0.142           | -0.248 | -0.378   | -0.325 | -0.237     | -0.359         | 0.547        |
| <b>Sweet potatoes</b>                       | -0.215           | -0.027 | 0.238    | -0.100 | -0.099     | -0.079         | -0.039       |
| <b>Physical activity METs</b>               | -0.099           | 0.028  | 0.021    | -0.393 | -0.212     | -0.306         | 0.268        |
| <b>Kcal /day available</b>                  | 0.114            | -0.044 | 0.182    | 0.640  | 0.615      | 0.601          | -0.187       |
| <b>Child/infant 2SD underweight</b>         | -0.060           | -0.081 | -0.216   | -0.497 | -0.457     | -0.300         | 0.089        |
| <b>Discontinued breast feeding &lt;6 mo</b> | 0.133            | -0.064 | 0.132    | 0.564  | 0.480      | 0.373          | -0.125       |

383  
384

385 **Table 2. Correlations between the risk factors that are in Table 1 (continued)**

| <b>Variables (foods in kcal/day)</b>        | <b>Legumes</b> | <b>Rice</b> | <b>Sweet potatoes</b> | <b>Physical activity</b> | <b>Kcal</b> | <b>Child/infant under-weight</b> |
|---------------------------------------------|----------------|-------------|-----------------------|--------------------------|-------------|----------------------------------|
| <b>Rice</b>                                 | -0.047         | 1.000       |                       |                          |             |                                  |
| <b>Sweet potatoes</b>                       | -0.053         | 0.072       | 1.000                 |                          |             |                                  |
| <b>Physical activity METs</b>               | -0.066         | 0.388       | 0.328                 | 1.000                    |             |                                  |
| <b>Kcal /day available</b>                  | -0.250         | -0.429      | -0.257                | -0.500                   | 1.000       |                                  |
| <b>Child/infant 2SD underweight</b>         | 0.507          | 0.377       | -0.164                | 0.138                    | -0.621      | 1.000                            |
| <b>Discontinued breast feeding &lt;6 mo</b> | -0.406         | -0.419      | -0.062                | -0.227                   | 0.727       | -0.836                           |

386  
387

388 **Table 3. Bradford Hill criteria consistency and dose response: Mean BMI and BMI**  
 389 **formula output differences in 37 subgroups**  
 390

| Subsets of worldwide data on risk factors related to BMI | n    | Mean BMI | BMI formula output with mean and SD equated with mean BMI | BMI and BMI formula <sup>‡</sup> output difference | BMI and BMI formula <sup>¶</sup> output difference | BMI and BMI formula <sup>†</sup> output difference |
|----------------------------------------------------------|------|----------|-----------------------------------------------------------|----------------------------------------------------|----------------------------------------------------|----------------------------------------------------|
| <b>Socio-demographic index quartile 1</b>                | 1966 | 24.54    | 24.75                                                     | 0.210                                              | 0.243                                              | 0.289                                              |
| SDI quartile 2                                           | 2096 | 21.82    | 21.69                                                     | 0.130                                              | 0.210                                              | 0.402                                              |
| SDI quartile 3                                           | 2220 | 20.40    | 20.30                                                     | 0.099                                              | 0.104                                              | 0.107                                              |
| SDI quartile 4                                           | 1604 | 20.31    | 20.31                                                     | 0.007                                              | 0.079                                              | 0.012                                              |
| Africa                                                   | 1682 | 21.67    | 21.25                                                     | 0.411                                              | 0.009                                              | 0.519                                              |
| Asia                                                     | 4188 | 20.47    | 20.46                                                     | 0.013                                              | 0.065                                              | 0.058                                              |
| Europe                                                   | 880  | 24.31    | 24.66                                                     | 0.343                                              | 0.388                                              | 0.234                                              |
| North America                                            | 592  | 25.97    | 26.00                                                     | 0.032                                              | 0.079                                              | 0.312                                              |
| Oceania                                                  | 54   | 24.43    | 24.66                                                     | 0.229                                              | 0.277                                              | 0.206                                              |
| South America                                            | 474  | 23.48    | 24.24                                                     | 0.761                                              | 0.667                                              | 0.463                                              |
| <b>Four countries with subnational data</b>              | 730  | 25.18    | 25.45                                                     | 0.267                                              | 0.300                                              | 0.964                                              |
| <b>Quartile 1 BMI increasing foods</b>                   | 2007 | 24.14    | 24.70                                                     | 0.565                                              | 0.572                                              | 0.654                                              |
| Q2                                                       | 1834 | 21.96    | 21.86                                                     | 0.096                                              | 0.103                                              | 0.274                                              |
| Q3                                                       | 2050 | 20.60    | 20.31                                                     | 0.293                                              | 0.281                                              | 0.205                                              |
| Q4                                                       | 1995 | 20.49    | 20.28                                                     | 0.212                                              | 0.226                                              | 0.224                                              |
| <b>Quartile 1 BMI decreasing foods</b>                   | 1475 | 20.61    | 20.16                                                     | 0.454                                              | 0.570                                              | 0.197                                              |
| Q2 BMI decreasing foods                                  | 2275 | 21.12    | 21.03                                                     | 0.092                                              | 0.114                                              | 0.114                                              |
| Q3 BMI decreasing foods                                  | 2211 | 22.48    | 22.74                                                     | 0.258                                              | 0.294                                              | 0.239                                              |
| Q4 BMI decreasing foods                                  | 1925 | 22.69    | 22.82                                                     | 0.125                                              | 0.199                                              | 0.112                                              |
| <b>Quartile 1 physical activity</b>                      | 2371 | 20.48    | 20.56                                                     | 0.081                                              | 0.089                                              | 0.019                                              |
| Q2 physical activity                                     | 1573 | 21.66    | 21.13                                                     | 0.533                                              | 0.598                                              | 0.554                                              |
| Q3 physical activity                                     | 2018 | 21.37    | 21.55                                                     | 0.175                                              | 0.198                                              | 0.308                                              |
| Q4 physical activity                                     | 1924 | 23.95    | 24.07                                                     | 0.118                                              | 0.136                                              | 0.125                                              |
| Male                                                     | 3943 | 21.51    | 21.91                                                     | 0.406                                              | 0.401                                              | 0.368                                              |
| Female                                                   | 3943 | 22.07    | 21.65                                                     | 0.423                                              | 0.419                                              | 0.382                                              |
| <b>Random controlled trial #1</b>                        | 100  | 21.92    | 21.96                                                     | 0.038                                              | 0.054                                              | 0.061                                              |
| RCT #2                                                   | 100  | 22.00    | 21.76                                                     | 0.236                                              | 0.226                                              | 0.198                                              |
| RCT #3                                                   | 100  | 21.67    | 21.78                                                     | 0.109                                              | 0.111                                              | 0.149                                              |
| RCT #4                                                   | 100  | 21.89    | 21.81                                                     | 0.074                                              | 0.069                                              | 0.064                                              |
| UK                                                       | 66   | 24.99    | 25.13                                                     | 0.132                                              | 0.132                                              | 0.393                                              |
| USA                                                      | 376  | 26.66    | 26.74                                                     | 0.082                                              | 0.132                                              | 0.380                                              |
| Japan                                                    | 158  | 21.89    | 22.87                                                     | 0.978                                              | 0.964                                              | 2.888                                              |
| Mexico                                                   | 130  | 24.99    | 24.99                                                     | 0.006                                              | 0.062                                              | 0.606                                              |
| <b>Quartile 1 Dose-response: BMI formula versus BMI</b>  | 1862 | 24.82    | 25.33                                                     | 0.509                                              | 0.538                                              | 0.663                                              |
| Q2 Dose-response                                         | 1802 | 22.44    | 22.06                                                     | 0.379                                              | 0.350                                              | 0.539                                              |
| Q3 Dose-response                                         | 1773 | 21.10    | 20.84                                                     | 0.266                                              | 0.034                                              | 0.201                                              |
| Q4 Dose-response                                         | 2449 | 19.51    | 19.56                                                     | 0.057                                              | 0.158                                              | 0.128                                              |
| <b>Mean of BMI - BMI formula absolute values</b>         |      |          |                                                           | 0.249                                              | 0.255                                              | 0.368                                              |



|                                                                  |  |  |  |       |       |       |
|------------------------------------------------------------------|--|--|--|-------|-------|-------|
| <b>Mean of BMI-BMI formula dose<br/>response absolute values</b> |  |  |  | 0.302 | 0.284 | 0.493 |
|------------------------------------------------------------------|--|--|--|-------|-------|-------|

391  
392 ‡In combination variables grouped by BMI increasing foods and BMI decreasing foods, each food was multiplied  
393 times (1) its kcal/day (2) its coefficient of determination ( $R^2$ ) with BMI, and (3) its ratio of kcal/day in SDI quartiles  
394 2-4 /SDI quartile 1. Fruits, vegetables, and nuts/seeds grouped with plants that negatively correlate with BMI.  
395 ¶ As with ‡ but with fruits, vegetables, and nuts/seeds grouped with plants that positively correlate with BMI  
396 † As with § but with food risk factor unadjusted but with food risk factors unadjusted  
397  
398

399 **Table 4. Cross validation: summary percent weight data for 20 RCT derived BMI**  
 400 **formulas↓**  
 401

| <b>Risk factors</b>                          | <b>Mean</b> | <b>Std Dev</b> | <b>Minimum</b> | <b>Maximum</b> |
|----------------------------------------------|-------------|----------------|----------------|----------------|
| <b>Processed meat kcal/day</b>               | 0.26        | 0.09           | 0.11           | 0.43           |
| <b>Red meat kcal/day</b>                     | 9.82        | 3.05           | 5.41           | 14.38          |
| <b>Fish kcal/day</b>                         | 0.18        | 0.51           | 0.01           | 1.97           |
| <b>Milk kcal/day</b>                         | 3.13        | 1.22           | 1.38           | 4.88           |
| <b>Poultry kcal/day available</b>            | 9.10        | 2.88           | 5.35           | 15.53          |
| <b>Eggs kcal/day available</b>               | 4.66        | 1.09           | 2.50           | 7.73           |
| <b>Alcohol kcal/day</b>                      | 1.78        | 2.08           | 0.01           | 7.92           |
| <b>Sugary beverages kcal/day</b>             | 7.24        | 1.51           | 0.01           | 14.62          |
| <b>Corn kcal/day available</b>               | 0.80        | 0.70           | 0.00           | 2.00           |
| <b>potatoes kcal/day available</b>           | 2.79        | 1.94           | 0.01           | 7.81           |
| <b>Saturated fatty acids kcal/day</b>        | 3.09        | 2.09           | 0.90           | 8.18           |
| <b>Poly unsaturated fatty acids kcal/day</b> | 0.71        | 0.38           | 0.18           | 1.50           |
| <b>Trans fatty acids kcal/day</b>            | 0.09        | 0.05           | 0.03           | 0.18           |
| <b>Fruits kcal/day</b>                       | 0.46        | 0.21           | 0.12           | 0.88           |
| <b>Vegetables kcal/day</b>                   | 0.63        | 0.30           | 0.23           | 1.31           |
| <b>Nuts and seeds kcal/day</b>               | 0.03        | 0.02           | 0.01           | 0.07           |
| <b>Whole grains kcal/day</b>                 | 0.13        | 0.02           | 0.00           | 0.39           |
| <b>Legumes kcal/day</b>                      | 0.56        | 3.51           | 0.09           | 1.54           |
| <b>Rice kcal/day available</b>               | 8.89        | 2.65           | 3.40           | 13.19          |
| <b>Sweet potatoes kcal/day available</b>     | 0.32        | 0.32           | 0.02           | 1.13           |
| <b>Physical activity METs</b>                | 9.76        | 4.09           | 4.24           | 13.29          |
| <b>Kcal available/day</b>                    | 7.89        | 3.23           | 3.68           | 13.56          |
| <b>Child/infant 2SD underweight</b>          | 5.41        | 4.51           | 2.49           | 8.29           |
| <b>Discontinued breast feeding &lt;6 mo</b>  | 1.19        | 0.84           | 0.20           | 2.96           |
| <b>Total percent weights</b>                 | 78.90       | 2.88           | 74.65          | 83.04          |

402  
 403 ↓ See Supplementary Table 7 for the data on the 20 RCTs each with n=100

404

405

406 **Table 5. BMI formula estimates with common dietary and other risk factor scenarios<sup>β</sup>**  
 407

| Testing common dietary and other risk factor scenarios with standardised BMI formula estimates                           | BMI kg/M <sup>2</sup> | BMI formula estimate |
|--------------------------------------------------------------------------------------------------------------------------|-----------------------|----------------------|
| World (n=7886 cohorts)                                                                                                   | 21.79                 | 21.71                |
| United Kingdom (n=66 cohorts)                                                                                            | 24.99                 | 25.09                |
| USA (n=376 cohorts)                                                                                                      | 26.66                 | 26.67                |
| <b>Following USA Dietary Guidelines 2015-2020 recommendations</b>                                                        |                       | 26.34                |
| USA with 25% reduction of BMI increasing food intake <sup>†</sup>                                                        |                       | 25.04                |
| USA with 50% reduction of BMI increasing food intake <sup>†</sup>                                                        |                       | 23.34                |
| USA mean physical activity plus 2 hours/day running at 6 mph                                                             |                       | 23.98                |
| USA mean physical activity plus 1 hour/day running at 6 mph and 25% reduction of BMI increasing food intake <sup>†</sup> |                       | 23.67                |
| USA with no red or processed meat <sup>†</sup>                                                                           |                       | 24.81                |
| USA with no sugary beverage intake <sup>†</sup>                                                                          |                       | 26.31                |
| USA vegetarian (no meat, poultry, fish) <sup>†</sup>                                                                     |                       | 22.54                |
| USA vegan (no meat, poultry, fish, dairy or eggs) <sup>†</sup>                                                           |                       | 21.11                |
| USA breast feeding continued at least 6 months in all                                                                    |                       | 26.68                |
| USA breast feeding discontinued before 6 months in all                                                                   |                       | 26.87                |
| USA no occurrence of child severe underweight                                                                            |                       | 26.73                |
| USA all children with severe underweight (theoretically)                                                                 |                       | 25.54                |
| EAT-Lancet diet                                                                                                          |                       | 22.47                |
| Low Carbohydrate Mediterranean Diet                                                                                      |                       | 31.76                |

408  
 409 <sup>β</sup> BMI formula estimates based on 28 years of following dietary and/or risk factor patterns  
 410 <sup>†</sup> Kcal/day isocalorically shifted to the 7 BMI decreasing foods in the BMI formula, distributed  
 411 equally  
 412

## 413 **Acknowledgments**

414• **Authors' contributions:** DKC acts as guarantor; conceived and designed the study, acquired  
415 and analysed the data, interpreted the study findings, drafted the manuscript, critically reviewed  
416 and edited the manuscript and tables, and approved the final version for publication.

417  
418 CW designed software programs in R to format and population weight the data,  
419 aided with the SAS statistical analysis, critically reviewed the manuscript, and  
420 approved the final version for publication.

421  
422 The corresponding author attests that all listed authors meet authorship criteria and that no others  
423 meeting the criteria have been omitted.

424  
425 **Copyright:** The retain the copyright to the paper

426  
427 The Patient and Public Involvement

428 • When and how were patients/public first involved in the research?

429 IHME acquired, catalogued and extracted information from over 12,000 surveys from  
430 government and non government agencies in order to compile the GBD database.

431 • How were the research question(s) developed and informed by their priorities,  
432 experience, and preferences?

433 The diverse surveys contributing to the GBD database had many different priorities and  
434 intentions unrelated to this post hoc analysis. The current analysis research questions were

435 developed to give researchers, policymakers, and the public the methodological tool to quantify  
436 the BMI impacts of dietary and other risk factor patterns.

437 ● How were patients/public involved in

438 (a) the design and conduct of the study?

439 The way patients/public were involved in the collection of the surveys has not been  
440 systematically studied and reported on. Patients/public are the intended beneficiaries of  
441 this analysis of the GBD data.

442 (b) choice of outcome measures?

443 The outcome measures chosen all related to human health and to adult BMI.

444 (c) recruitment to the study?

445 The recruitment methods varied by the survey.

446 ● How were (or will) patients/ public be involved in choosing the methods and agreeing  
447 plans for dissemination of the study results to participants and linked communities?

448 IHME and all the health surveyors that contributed will make these decisions. This analysis of  
449 the data will be available to all by open access.

450

451● **Competing interests statement:** Both authors have completed the ICMJE uniform disclosure  
452 form at [www.icmje.org/coi\\_disclosure.pdf](http://www.icmje.org/coi_disclosure.pdf) and declare: no support from any organisation for the  
453 submitted work; no financial relationships with any organisations that might have an interest in  
454 the submitted work in the previous three years; no other relationships or activities that could  
455 appear to have influenced the submitted work.

456

457 **Contributors:** Martin Sebera, from the Department of Kinesiology, Faculty of Sports Studies

458 Masaryk University, Czech Republic, critiqued statistical aspects of the manuscript and provided  
459 useful input. Pavel Grasgruber, from Masaryk University, Czech Republic, provided suggestions  
460 after reviewing the manuscript.

461  
462 **Transparency declaration:** The manuscript is an honest, accurate, and transparent account of  
463 the study being reported; that no important aspects of the study have been omitted; and that any  
464 discrepancies from the study as planned have been explained.

465  
466 **Ethics:** Studies based solely on data from IHME GBD database do not need approval from any  
467 bioethics committee.

468  
469• **Funding:** This research received no specific grant from any funding agency in the public,  
470 commercial or not-for-profit sectors. The Bill and Melinda Gates Foundation funded the  
471 acquisition of the data for this analysis by the IHME. The data were provided to the authors as  
472 volunteer collaborators with IHME.

473•  
474  
475 **Details of the role of the study sponsors:** While IHME GBD faculty and staff by virtue of  
476 Gates Foundation grants provided the raw data for this analysis, they did not vet the analysis or  
477 sponsor the manuscript.

478  
479 **Statement of independence of researchers from funders:** The researchers have received no  
480 funding. Gates Foundation funded IHME to collect and analyse the GBD data.

481 **Dissemination declaration:** Dissemination of this manuscript to the participants of the more  
482 than 12,000 surveys is not possible individually, but the information will become in the public  
483 domain.

484  
485 **Disclosures:** We thank Scott Glenn and Brent Bell from IHME who supplied us with the GBD  
486 risk factor exposure data for the risk factors and for BMI data.

487•  
488 **Ethics:** Studies were based solely on data from the IHME GBD database and do not need  
489 approval from any bioethics committee.

490  
491 **Participant informed consents:** Not applicable.

492  
493 **Author access to data:** As volunteer collaborators with the Institute of Health Metrics and  
494 Evaluation, we received about 1.4 gigabytes of raw data on BMI and 32 relevant risk factors for  
495 BMI and other health outcomes.

496  
497 **Data sharing statement:** The raw, unformatted data used in this analysis is now out of date. The  
498 2019 GBD data on all the variables in this analysis may be obtained from the IHME by volunteer  
499 collaborating researchers. Our data formatting software code in R and SAS and our formatted  
500 database are available on request to researchers.

501  
502 **Protocol, submitted as a supplementary file:** Not applicable.

503

504 **STROBE checklist:** Submitted.

505

506 **Patient consent:** Not applicable.

507

508 **Clinical trial registration:** Not applicable.



## 509 **References**

- 510 1. Teicholz N. **The scientific report guiding the US dietary guidelines: is it scientific?**  
511 *BMJ*. 2015; **351**. <http://www.bmj.com/bmj/351/bmj.h4962.full.pdf>
- 512 2. **Outcome of Post-publication review of article by Nina Teicholz.** *BMJ*. 2015; **351**:  
513 h4962. <https://www.bmj.com/content/351/bmj.h4962/rr-48>
- 514 3. Gardner CD, Trepanowski JF, Del Gobbo LC, et al. **Effect of Low-Fat vs Low-**  
515 **Carbohydrate Diet on 12-Month Weight Loss in Overweight Adults and the**  
516 **Association With Genotype Pattern or Insulin Secretion: The DIETFITS**  
517 **Randomized Clinical Trial.** *JAMA*. 2018; **319** (7): 667-679.  
518 <https://jamanetwork.com/journals/jama/fullarticle/2673150>
- 519 4. Ioannidis JA. **The challenge of reforming nutritional epidemiologic research** *JAMA*  
520 2018; **320** (10): 969-70. <http://dx.doi.org/10.1001/jama.2018.11025>
- 521 5. Hill AB. **THE ENVIRONMENT AND DISEASE: ASSOCIATION OR**  
522 **CAUSATION?** *Proceedings of the Royal Society of Medicine*. 1965; **58** (5): 295-300.  
523 <https://www.ncbi.nlm.nih.gov/pmc/articles/PMC1898525/>
- 524 6. Global Burden of Disease Study 2017 (GBD 2017) Data Input Sources Tool. Seattle,  
525 Washington: Institute of Health Metrics and Evaluation Accessed August 10, 2019.  
526 <http://ghdx.healthdata.org/gbd-2017/data-input-sources>
- 527 7. **GBD 2017 Risk Factor Collaborators. Global, regional, and national comparative**  
528 **risk assessment of 84 behavioural, environmental and occupational, and metabolic**  
529 **risks or clusters of risks for 195 countries and territories, 1990-2017: a systematic**  
530 **analysis for the Global Burden of Disease Study 2017: Table of risk factor**  
531 **definitions.** *The Lancet*. 2018; **392** (10159): 1923-94.

- 532 [https://www.thelancet.com/action/showFullTableHTML?isHtml=true&tableId=tbl1&pii=](https://www.thelancet.com/action/showFullTableHTML?isHtml=true&tableId=tbl1&pii=S0140-6736%2818%2932225-6)  
533 [S0140-6736%2818%2932225-6](https://www.thelancet.com/action/showFullTableHTML?isHtml=true&tableId=tbl1&pii=S0140-6736%2818%2932225-6)
- 534 8. PROTOCOL FOR THE GLOBAL BURDEN OF DISEASES, INJURIES, AND RISK  
535 FACTORS STUDY (GBD) Version 3.0; Issue 26. Seattle, Washington: Institute for  
536 Health Metrics and Evaluation Accessed August 2, 2019.  
537 [http://www.healthdata.org/sites/default/files/files/Projects/GBD/GBD\\_Protocol.pdf](http://www.healthdata.org/sites/default/files/files/Projects/GBD/GBD_Protocol.pdf)
- 538 9. Naghavi M, Abajobir AA, Abbafati C, et al. **Global, regional, and national age-sex**  
539 **specific mortality for 264 causes of death, 1980-2016: a systematic analysis for the**  
540 **Global Burden of Disease Study 2016.** *The Lancet.* 2017; **390** (10100): 1151-1210.  
541 [https://doi.org/10.1016/S0140-6736\(17\)32152-9](https://doi.org/10.1016/S0140-6736(17)32152-9)
- 542 10. Flaxman AD, Lee YY, Vos T, et al. An Integrative Metaregression Framework for  
543 Descriptive Epidemiology. Seattle, WA: University of Washington Press, 2015.
- 544 11. GBD 2017 Risk Factor Collaborators. **Global, regional, and national comparative risk**  
545 **assessment of 84 behavioural, environmental and occupational, and metabolic risks**  
546 **or clusters of risks for 195 countries and territories, 1990-2017: a systematic**  
547 **analysis for the Global Burden of Disease Study 2017.** . *The Lancet.* 2018; **392**  
548 (10159): 1923-94. [https://doi.org/10.1016/S0140-6736\(18\)32225-6](https://doi.org/10.1016/S0140-6736(18)32225-6)
- 549 12. Call for Collaborators. Seattle, Washington: Institute for Health Metrics and Evaluation  
550 at the University of Washington 2019; Accessed April 25, 2019.  
551 <http://www.healthdata.org/gbd/call-for-collaborators>
- 552 13. Stevens GA, Alkema L, Black PRE, et al. **Guidelines for Accurate and Transparent**  
553 **Health Estimates Reporting: the GATHER statement.** *The Lancet.* 2016; **388**  
554 (10062): e19-e23. [https://doi.org/10.1016/S0140-6736\(16\)30388-9](https://doi.org/10.1016/S0140-6736(16)30388-9)

- 555 14. Omega 3 Fatty Acids: Fact Sheet for Health Professionals. The Office of Dietary  
556 Supplements 2018; Accessed September 1, 2018.  
557 <https://ods.od.nih.gov/factsheets/Omega3FattyAcids-HealthProfessional/>
- 558 15. Nutritionix Track App. Syndigo LLC Accessed April 25, 2019.  
559 <https://www.nutritionix.com/>
- 560 16. POTATO PROCESSING AND USES. Lima, Peru: International Potato Center  
561 Accessed May 28, 2020. <https://cipotato.org/potato/potato-processing-uses/>
- 562 17. Ruotsalainen H, Kyngäs H, Tammelin T, Kääriäinen M. **Systematic review of physical**  
563 **activity and exercise interventions on body mass indices, subsequent physical**  
564 **activity and psychological symptoms in overweight and obese adolescents.** *Journal of*  
565 *Advanced Nursing.* 2015; **71** (11): 2461-2477.  
566 <https://onlinelibrary.wiley.com/doi/abs/10.1111/jan.12696>
- 567 18. Te Morenga L, Mallard S, Mann J. **Dietary sugars and body weight: systematic review**  
568 **and meta-analyses of randomised controlled trials and cohort studies.** *BMJ* 2013;  
569 **346:** e7492. <https://www.bmj.com/content/bmj/346/bmj.e7492.full.pdf>
- 570 19. Traversy G, Chaput J-P. **Alcohol Consumption and Obesity: An Update.** *Current*  
571 *obesity reports.* 2015; **4** (1): 122-130.  
572 <https://www.ncbi.nlm.nih.gov/pmc/articles/PMC4338356/>
- 573 20. Turner-McGrievy G, Mandes T, Crimarco A. **A plant-based diet for overweight and**  
574 **obesity prevention and treatment.** *Journal of geriatric cardiology : JGC.* 2017; **14** (5):  
575 369-374. <https://www.ncbi.nlm.nih.gov/pmc/articles/PMC5466943/>
- 576 21. AINSWORTH BE, HASKELL WL, HERRMANN SD, et al. **Compendium of Physical**  
577 **Activities: A Second Update of Codes and MET Values.** *Medicine & Science in Sports*

- 578            & *Exercise*. 2011 **43** (8): 1575-1581. [https://journals.lww.com/acsm-](https://journals.lww.com/acsm-msse/Fulltext/2011/08000/2011_Compndium_of_Physical_Activities__A_Second.25.aspx)  
579            [msse/Fulltext/2011/08000/2011\\_Compndium\\_of\\_Physical\\_Activities\\_\\_A\\_Second.25.as](https://journals.lww.com/acsm-msse/Fulltext/2011/08000/2011_Compndium_of_Physical_Activities__A_Second.25.aspx)  
580            px
- 581    22.        Ebbeling CB, Feldman HA, Klein GL, et al. **Effects of a low carbohydrate diet on**  
582            **energy expenditure during weight loss maintenance: randomized trial.** *BMJ*. 2018;  
583            **363**: k4583.
- 584    23.        Darmon N, Drewnowski A. **Contribution of food prices and diet cost to**  
585            **socioeconomic disparities in diet quality and health: a systematic review and**  
586            **analysis.** *Nutrition reviews*. 2015; **73** (10): 643-660.  
587            <https://www.ncbi.nlm.nih.gov/pmc/articles/PMC4586446/>
- 588    24.        Wakamo B. We Subsidize the Wrong Kind of Agriculture. Inequality.org Accessed.  
589            <https://inequality.org/great-divide/subsidize-wrong-kind-agriculture/>
- 590    25.        Tagtow A. Fruits and Veggies Now Chock Full of Marketing Power. Washington, DC  
591            2017; Accessed June 24, 2020. [https://www.usda.gov/media/blog/2015/05/07/fruits-and-](https://www.usda.gov/media/blog/2015/05/07/fruits-and-veggies-now-chock-full-marketing-power)  
592            [veggies-now-chock-full-marketing-power](https://www.usda.gov/media/blog/2015/05/07/fruits-and-veggies-now-chock-full-marketing-power)
- 593    26.        Stolzer JM. **Breastfeeding and obesity: a meta-analysis.** *Open Journal of Preventive*  
594            *Medicine*. 2011; **1** (3): 88-93.  
595            <http://www.scirp.org/journal/paperinformation.aspx?paperid=8509>
- 596    27.        AAP Reaffirms Breastfeeding Guidelines. The American Academy of Pediatrics 2012;  
597            Accessed August 10, 2019. [https://www.aap.org/en-us/about-the-aap/aap-press-](https://www.aap.org/en-us/about-the-aap/aap-press-room/Pages/AAP-Reaffirms-Breastfeeding-Guidelines.aspx)  
598            [room/Pages/AAP-Reaffirms-Breastfeeding-Guidelines.aspx](https://www.aap.org/en-us/about-the-aap/aap-press-room/Pages/AAP-Reaffirms-Breastfeeding-Guidelines.aspx)
- 599    28.        **Breastfeeding and the Use of Human Milk.** *Pediatrics*. 2012; **129** (3): e827-e841.  
600            doi:10.1542/peds.2011-3552

- 601 29. Quality statement 5: Breastfeeding. National Institute of Clinical Excellence 2013;  
602 Accessed August 10, 2019. [https://www.nice.org.uk/guidance/qs37/chapter/Quality-](https://www.nice.org.uk/guidance/qs37/chapter/Quality-statement-5-Breastfeeding)  
603 [statement-5-Breastfeeding](https://www.nice.org.uk/guidance/qs37/chapter/Quality-statement-5-Breastfeeding)
- 604 30. FORESIGHT--Tackling Obesities: Future Choices -Follow Up Actions. London,  
605 England: Government Office for Science (UK) October 2007; Accessed August 5, 2019.  
606 [https://assets.publishing.service.gov.uk/government/uploads/system/uploads/attachment\\_](https://assets.publishing.service.gov.uk/government/uploads/system/uploads/attachment_data/file/295885/07-1526-obesity-action-plan.pdf)  
607 [data/file/295885/07-1526-obesity-action-plan.pdf](https://assets.publishing.service.gov.uk/government/uploads/system/uploads/attachment_data/file/295885/07-1526-obesity-action-plan.pdf)
- 608 31. Mărginean CO, Mărginean C, Meliț LE. **New Insights Regarding Genetic Aspects of**  
609 **Childhood Obesity: A Minireview.** *Frontiers in pediatrics.* 2018; **6**: 271-271.  
610 <https://www.ncbi.nlm.nih.gov/pmc/articles/PMC6180186/>
- 611 32. Castaner O, Goday A, Park Y-M, et al. **The Gut Microbiome Profile in Obesity: A**  
612 **Systematic Review.** *International journal of endocrinology.* 2018; **2018**: 4095789-  
613 4095789. <https://www.ncbi.nlm.nih.gov/pmc/articles/PMC5933040/>
- 614 33. Monteiro CA, Moubarac J-C, Levy RB, Canella DS, Louzada MLdC, Cannon G.  
615 **Household availability of ultra-processed foods and obesity in nineteen European**  
616 **countries.** *Public Health Nutrition.* 2017; **21** (1): 18-26.  
617 [https://www.cambridge.org/core/article/household-availability-of-ultraprocessed-foods-](https://www.cambridge.org/core/article/household-availability-of-ultraprocessed-foods-and-obesity-in-nineteen-european-countries/D63EF7095E8EFE72BD825AFC2F331149)  
618 [and-obesity-in-nineteen-european-countries/D63EF7095E8EFE72BD825AFC2F331149](https://www.cambridge.org/core/article/household-availability-of-ultraprocessed-foods-and-obesity-in-nineteen-european-countries/D63EF7095E8EFE72BD825AFC2F331149)
- 619 34. Monteiro CA, Cannon G, Levy RB, et al. **Ultra-processed foods: what they are and**  
620 **how to identify them.** *Public Health Nutrition.* 2019; **22** (5): 936-941.  
621 [https://www.cambridge.org/core/article/ultraprocessed-foods-what-they-are-and-how-to-](https://www.cambridge.org/core/article/ultraprocessed-foods-what-they-are-and-how-to-identify-them/E6D744D714B1FF09D5BCA3E74D53A185)  
622 [identify-them/E6D744D714B1FF09D5BCA3E74D53A185](https://www.cambridge.org/core/article/ultraprocessed-foods-what-they-are-and-how-to-identify-them/E6D744D714B1FF09D5BCA3E74D53A185)
- 623

624 Supplementary Table 1. Definitions of IHME GBD risk factors and covariates related to BMI

| <b>Variables</b>                   | <b>Definition</b>                                                                                                                                                                                                                                                                                                                                                                                                                                                                    |
|------------------------------------|--------------------------------------------------------------------------------------------------------------------------------------------------------------------------------------------------------------------------------------------------------------------------------------------------------------------------------------------------------------------------------------------------------------------------------------------------------------------------------------|
| <b>Alcohol</b>                     | Any alcohol consumption (g/day)                                                                                                                                                                                                                                                                                                                                                                                                                                                      |
| <b>Body-mass index</b>             | Body mass index (BMI) (kg/m <sup>2</sup> )—the dependent variable of interest                                                                                                                                                                                                                                                                                                                                                                                                        |
| <b>Child underweight</b>           | Proportion of children - 3 SD to - 2 SD of the WHO 2006 standard weight-for-age curve (0-1)                                                                                                                                                                                                                                                                                                                                                                                          |
| <b>Corn</b>                        | Corn availability percapita (g/day), a covariate                                                                                                                                                                                                                                                                                                                                                                                                                                     |
| <b>Discontinued breast feeding</b> | Proportion of children aged 6-23 months who do not receive any breast milk                                                                                                                                                                                                                                                                                                                                                                                                           |
| <b>Eggs</b>                        | Eggs availability percapita (g/day) a covariate                                                                                                                                                                                                                                                                                                                                                                                                                                      |
| <b>Fasting plasma glucose</b>      | Fasting plasma glucose (mmol/L)                                                                                                                                                                                                                                                                                                                                                                                                                                                      |
| <b>Fish</b>                        | This variable expressed in g/day was derived by determining the weight of fish in g corresponding to 1 g of omega-3 fatty acids (eicosapentaenoic acid and docosahexaenoic acid) by averaging the fish g per 1 g of omega-3 fatty acids 20 species of fish= 117.04 g/day fish/1 g/day omega-3 fatty acids (Supplementary Table 2)                                                                                                                                                    |
| <b>Fruits</b>                      | Consumption of fruits (includes fresh, frozen, cooked, canned, or dried fruit but excludes fruit juices and salted or pickled fruits) (g/day)                                                                                                                                                                                                                                                                                                                                        |
| <b>Kilocalories available /day</b> | The mean number of kilocalories percapita available per day to people in each location (kcal/day available), a covariate                                                                                                                                                                                                                                                                                                                                                             |
| <b>LDL cholesterol</b>             | Serum low-density lipoprotein cholesterol (mmol/L)                                                                                                                                                                                                                                                                                                                                                                                                                                   |
| <b>Legumes</b>                     | Consumption of beans, lentils, pulses (g/day)                                                                                                                                                                                                                                                                                                                                                                                                                                        |
| <b>Milk</b>                        | Consumption of milk including non-fat, low-fat, and full-fat milk but excluding soy milk and other plant derivatives (g/day)                                                                                                                                                                                                                                                                                                                                                         |
| <b>Nuts and seeds</b>              | Consumption of nuts and seeds (g/day)                                                                                                                                                                                                                                                                                                                                                                                                                                                |
| <b>Physical activity</b>           | Average weekly physical activity at work, home, transport-related and recreational measured by MET min per week. Less than 3000 METs per week constitutes low physical activity.                                                                                                                                                                                                                                                                                                     |
| <b>Poultry</b>                     | Poultry availability percapita (g/day), a covariate                                                                                                                                                                                                                                                                                                                                                                                                                                  |
| <b>Potatoes</b>                    | Potatoes availability percapita (g/day), a covariate                                                                                                                                                                                                                                                                                                                                                                                                                                 |
| <b>Processed meat</b>              | Consumption of any processed meat (includes meat preserved by smoking, curing, salting, or addition of chemical preservatives, including bacon, salami, sausages, or deli or luncheon meats like ham, turkey, and pastrami) (g/day)                                                                                                                                                                                                                                                  |
| <b>Red meat</b>                    | Consumption of red meat (includes beef, pork, lamb, and goat but excludes poultry, fish, eggs, and all processed meats) (g/day)                                                                                                                                                                                                                                                                                                                                                      |
| <b>Rice</b>                        | Rice availability percapita (g/day), a covariate                                                                                                                                                                                                                                                                                                                                                                                                                                     |
| <b>Seafood omega-3 fatty acids</b> | Seafood omega-3 fatty acids (eicosapentaenoic acid and docosahexaenoic acid) in tablet or fish form (g/day)                                                                                                                                                                                                                                                                                                                                                                          |
| <b>Socio-demographic index</b>     | SDI is a composite indicator of development status that was originally constructed for GBD 2015, and is derived from components that correlate strongly with health outcomes. It is the geometric mean for indices of the total fertility rate among women younger than 25 years, mean education for those aged 15 years or older, and lag-distributed income per capita. The resulting metric ranges from 0 to 1, with higher values corresponding to higher levels of development. |
| <b>Sugar-sweetened beverages</b>   | Consumption of any beverage with ≥50 calories of sugar per one-cup serving, including carbonated beverages, sodas, energy drinks, fruit drinks but excluding 100% fruit and vegetable juices (g/day)                                                                                                                                                                                                                                                                                 |
| <b>Sweet potatoes</b>              | Sweet potato availability percapita (g/day), a covariate                                                                                                                                                                                                                                                                                                                                                                                                                             |
| <b>Systolic blood pressure</b>     | Systolic blood pressure (mm Hg)                                                                                                                                                                                                                                                                                                                                                                                                                                                      |
| <b>Total sugar</b>                 | Total sugar availability percapita (g/day), a covariate                                                                                                                                                                                                                                                                                                                                                                                                                              |

|                     |                                                                                                                                                                                                 |
|---------------------|-------------------------------------------------------------------------------------------------------------------------------------------------------------------------------------------------|
| <b>Vegetables</b>   | Consumption of frozen, cooked, canned, or dried vegetables (including legumes but excluding salted or pickled, juices, nuts and seeds, and starchy vegetables such as potatoes or corn) (g/day) |
| <b>Whole grains</b> | Consumption of whole grains (bran, germ, and endosperm in their natural proportions) from breakfast cereals, bread, rice, pasta, biscuits, muffins, tortillas, pancakes, and others (g/day)     |

625

626

627 **Supplementary Table 2. Omega-3 Fatty Acid g to fish g calculation¶¶**

| <b>Fish</b>                                                | <b>DHA g/3 ounce fish</b> | <b>EPA g/3 ounce fish</b> | <b>Omega-3 Fatty Acids (DHA + EPA) g/3 ounce fish mean</b> | <b>Fish 3 ounces = 85.02 g</b> | <b>Fish (g) per omega-3 Fatty Acids (g)=columns E/F</b> |
|------------------------------------------------------------|---------------------------|---------------------------|------------------------------------------------------------|--------------------------------|---------------------------------------------------------|
| <b>Salmon Atlantic farmed</b>                              | 1.24                      | 0.59                      |                                                            |                                |                                                         |
| <b>Salmon Atlantic wild</b>                                | 1.22                      | 0.35                      |                                                            |                                |                                                         |
| <b>Herring Atlantic</b>                                    | 0.94                      | 0.77                      |                                                            |                                |                                                         |
| <b>Sardines canned in tomato sauce drained</b>             | 0.74                      | 0.45                      |                                                            |                                |                                                         |
| <b>Mackerel Atlantic</b>                                   | 0.59                      | 0.43                      |                                                            |                                |                                                         |
| <b>Salmon pink canned drained</b>                          | 0.63                      | 0.28                      |                                                            |                                |                                                         |
| <b>Trout rainbow wild</b>                                  | 0.44                      | 0.40                      |                                                            |                                |                                                         |
| <b>Oysters eastern wild</b>                                | 0.23                      | 0.30                      |                                                            |                                |                                                         |
| <b>Sea bass</b>                                            | 0.47                      | 0.18                      |                                                            |                                |                                                         |
| <b>Shrimp</b>                                              | 0.12                      | 0.12                      |                                                            |                                |                                                         |
| <b>Lobster</b>                                             | 0.07                      | 0.10                      |                                                            |                                |                                                         |
| <b>Tuna light canned in water drained</b>                  | 0.17                      | 0.02                      |                                                            |                                |                                                         |
| <b>Tilapia</b>                                             | 0.11                      |                           |                                                            |                                |                                                         |
| <b>Scallops</b>                                            | 0.09                      | 0.06                      |                                                            |                                |                                                         |
| <b>Cod Pacific</b>                                         | 0.1                       | 0.04                      |                                                            |                                |                                                         |
| <b>Tuna yellowfin</b>                                      | 0.09                      | 0.01                      |                                                            |                                |                                                         |
| <b>Mean DHA and EPA Omega-3 Fatty Acids g/3 ounce fish</b> | 0.4531                    | 0.2733                    |                                                            |                                |                                                         |
| <b>Calculations total Omega-3 FA g to fish g</b>           |                           |                           | 0.7264                                                     | 85.02                          | 117.043                                                 |

628 ¶¶ Data on omega-3 fatty acid content of varieties of fish came from the National Institutes of  
 629 Health Office of Dietary Supplements (USA)  
 630



631 **Supplementary Table 3. Calculations of kcal/day from g/day of animal and plant foods¶**

| <b>Foods</b>                     | <b>Food sub-categories</b> | <b>kcal/serving</b> | <b>g/serving</b> | <b>kcal/g</b> |
|----------------------------------|----------------------------|---------------------|------------------|---------------|
| <b>Milk (2% fat)</b>             |                            | 122                 | 244              | 0.5           |
| <b>Fish</b>                      |                            | 218                 | 170              | 1.28          |
| <b>Eggs</b>                      |                            | 72                  | 50               | 1.44          |
| <b>Poultry</b>                   |                            | 187                 | 85               | 2.91          |
| <b>Red meat</b>                  |                            | 247                 | 85               | 2.91          |
| <b>Processed meat</b>            |                            |                     |                  |               |
|                                  | <b>Salami</b>              | 222                 | 59               | 3.76          |
|                                  | <b>Pastrami</b>            | 104                 | 71               | 1.46          |
|                                  | <b>Ring baloney</b>        | 86                  | 28               | 3.07          |
|                                  | <b>Pepperoni</b>           | 94                  | 100              | 0.94          |
| <b>Average processed meat</b>    |                            | 126.5               | 64.5             | 1.96          |
| <b>Fruits</b>                    |                            | 97                  | 162              | 0.60          |
| <b>Vegetables</b>                |                            | 59                  | 91               | 0.65          |
| <b>Legumes</b>                   |                            | 249                 | 179              | 1.39          |
| <b>Nuts</b>                      |                            | 172                 | 28               | 6.14          |
| <b>Seeds</b>                     |                            |                     |                  |               |
|                                  | <b>Flax seeds</b>          | 55                  | 10               | 5.5           |
|                                  | <b>Chia seeds</b>          | 58                  | 12               | 4.83          |
|                                  | <b>Fennel seeds</b>        | 34.5                | 10               | 3.45          |
|                                  | <b>Hemp seeds</b>          | 55.3                | 10               | 5.53          |
| <b>Average of seeds</b>          |                            | 50.7                | 10.5             | 4.83          |
| <b>Average of nuts and seeds</b> |                            | 111.4               | 19.25            | 5.78          |
| <b>Corn</b>                      |                            | 99                  | 103              | 0.96          |
| <b>Potatoes</b>                  |                            | 161                 | 173              | 0.93          |
| <b>Sweet potatoes</b>            |                            | 115                 | 151              | 0.76          |
| <b>Rice</b>                      |                            | 205                 | 158              | 1.3           |
| <b>Whole grains</b>              |                            | 120                 | 52               | 2.31          |

632 ¶ Source: NutritionIX app

633

634 **Supplementary Table 4. Multicollinearity of fruits, vegetables, and nuts and seeds**

| High BMI risk factors (n=7886 cohorts)            | Mean Kcal/day | BMI kg/M <sup>2</sup> r | 95% CI           | P       | BMI increasing r † | 95% CI           | P       |
|---------------------------------------------------|---------------|-------------------------|------------------|---------|--------------------|------------------|---------|
| BMI kg/m <sup>2</sup>                             | 21.79         |                         |                  |         | 0.724              | 0.713 to 0.734   | <0.0001 |
| BMI increasing r                                  | 654           | 0.597                   | 0.583 to 0.611   | <0.0001 |                    |                  |         |
| Fruits + vegetables + nuts and seeds              | 129           | 0.655                   | 0.642 to 0.677   | <0.0001 | 0.323              | 0.304 to 0.343   | <0.0001 |
| Fruits                                            | 40.4          | 0.622                   | 0.609 to 0.636   | <0.0001 | 0.498              | 0.482 to 0.515   | <0.0001 |
| Vegetables                                        | 80.1          | 0.520                   | 0.503 to 0.536   | <0.0001 | 0.150              | 0.128 to 0.171   | <0.0001 |
| Nuts and seeds                                    | 8.51          | 0.486                   | 0.469 to 0.503   | <0.0001 | 0.279              | 0.258 to 0.299   | <0.0001 |
| Top socio-demographic index (SDI) quartile n=1996 | Kcal/day      | BMI kg/M <sup>2</sup> r | 95% CI           | P       | BMI increasing r † | 95% CI           | P       |
| BMI kg/m <sup>2</sup>                             | 24.54         |                         |                  |         | 0.364              | 0.325 to 0.402   | <0.0001 |
| BMI increasing                                    | 905           | 0.364                   | 0.325 to 0.402   | <0.0001 |                    |                  |         |
| Fruits + vegetables + nuts and seeds              | 199           | 0.104                   | 0.060 to 0.148   | <0.0001 | -0.306             | 0.346 to 0.266   | <0.0001 |
| Fruits                                            | 61.1          | 0.296                   | 0.255 to 0.336   | <0.0001 | -0.022             | -0.007 to -0.095 | 0.32    |
| Vegetables                                        | 120           | -0.064                  | -0.108 to -0.020 | 0.0043  | -0.388             | -0.425 to -0.350 | <0.0001 |
| Nuts and seeds                                    | 17.5          | 0.314                   | 0.273 to 0.353   | 0.0018  | -0.118             | -0.161 to -0.074 | <0.0001 |
| Bottom three SDI quartiles (n=5920 cohorts)       | Kcal/day      | BMI kg/M <sup>2</sup> r | 95% CI           | P       | BMI increasing r † | 95% CI           | P       |
| BMI kg/m <sup>2</sup>                             | 20.88         |                         |                  |         | 0.364              | 0.342 to 0.386   | <0.0001 |
| BMI increasing                                    | 571           | 0.364                   | 0.342 to 0.386   | <0.0001 |                    |                  |         |
| Fruits + vegetables + nuts and seeds              | 106           | 0.536                   | 0.517 to 0.554   | <0.0001 | 0.108              | 0.083 to 0.133   | <0.0001 |
| Fruits                                            | 33.5          | 0.466                   | 0.446 to 0.486   | <0.0001 | 0.429              | 0.408 to 0.450   | <0.0001 |
| Vegetables                                        | 66.8          | 0.395                   | 0.374 to 0.417   | 0.0043  | -0.103             | -0.128 to -0.077 | 0.0186  |
| Nuts and seeds                                    | 5.52          | -0.040                  | -0.066 to -0.015 | 0.0018  | -0.072             | -0.098 to -0.047 | <0.0001 |

635  
 636 † BMI increasing foods include all six animal products, alcohol, sugary beverages, corn (high  
 637 fructose corn syrup included), and potatoes (highly processed potato products included).  
 638 Saturated fatty acids, PUFAs, and TFAs also correlate positively with BMI. However, for the  
 639 purposes of this table, they were not included with BMI increasing foods, because animal foods  
 640 contain most of the fatty acids.  
 641

642 **Supplementary Table 5. Derivation of the BMI formula (variables all standardized)**

| A                                           | B | C           | D | E                  | F | G                          | H | I                                                                                  | J | K                                                                                                 |
|---------------------------------------------|---|-------------|---|--------------------|---|----------------------------|---|------------------------------------------------------------------------------------|---|---------------------------------------------------------------------------------------------------|
| <b>Variables in BMI formula</b>             |   | <b>Mean</b> |   | <b>R2 with BMI</b> |   | <b>SDI Q 2-4 / SDI Q 1</b> |   | <b>Foods and physical activity multiple regression derived parameter estimates</b> |   | <b>Foods and physical activity synthesis parameter estimates= Columns C*E*G*I absolute values</b> |
| Processed meat kcal/day                     | * | 5.486       | * | 0.365              | * | 0.099                      | * | 0.02972                                                                            | = | 0.00586                                                                                           |
| Red meat kcal/day                           | * | 50.70       | * | 0.438              | * | 0.364                      | * | 0.02972                                                                            | = | 0.24003                                                                                           |
| Fish kcal/day                               | * | 10.02       | * | 0.011              | * | 0.106                      | * | 0.02972                                                                            | = | 0.00033                                                                                           |
| Milk kcal/day                               | * | 25.37       | * | 0.468              | * | 0.214                      | * | 0.02972                                                                            | = | 0.07553                                                                                           |
| Poultry kcal/day availability               | * | 45.06       | * | 0.661              | * | 0.253                      | * | 0.02972                                                                            | = | 0.22416                                                                                           |
| Eggs kcal/day availability                  | * | 19.47       | * | 0.473              | * | 0.402                      | * | 0.02972                                                                            | = | 0.11011                                                                                           |
| Alcohol kcal/day                            | * | 81.71       | * | 0.028              | * | 0.587                      | * | 0.02972                                                                            | = | 0.03948                                                                                           |
| Sugary beverages kcal/day                   | * | 297.7       | * | 0.014              | * | 1.013                      | * | 0.02972                                                                            | = | 0.12722                                                                                           |
| Corn kcal/day availability                  | * | 34.67       | * | 0.005              | * | 1.081                      | * | 0.02972                                                                            | = | 0.00590                                                                                           |
| Potatoes kcal/day availability              | * | 84.16       | * | 0.044              | * | 0.644                      | * | 0.02972                                                                            | = | 0.07137                                                                                           |
| Saturated fatty acids                       | * | 191.3       | * | 0.504              | * | 0.653                      | * | 0.0008705                                                                          | = | 0.05481                                                                                           |
| Polyunsaturated fatty acids                 | * | 82.24       | * | 0.543              | * | 0.334                      | * | 0.0008705                                                                          | = | 0.01297                                                                                           |
| Trans fatty acids                           | * | 13.39       | * | 0.238              | * | 0.471                      | * | 0.0008705                                                                          | = | 0.00131                                                                                           |
| Fruits kcal/day                             | * | 40.39       | * | 0.387              | * | 0.549                      | * | 0.0008705                                                                          | = | 0.00747                                                                                           |
| Vegetables kcal/day                         | * | 80.14       | * | 0.270              | * | 0.555                      | * | 0.0008705                                                                          | = | 0.01046                                                                                           |
| Nuts and seeds kcal/day                     | * | 8.511       | * | 0.237              | * | 0.315                      | * | 0.0008705                                                                          | = | 0.00055                                                                                           |
| Whole grains kcal/day                       | * | 55.65       | * | 0.040              | * | 1.248                      | * | 0.0008705                                                                          | = | 0.00243                                                                                           |
| Legumes kcal/day                            | * | 51.65       | * | 0.148              | * | 1.432                      | * | 0.0008705                                                                          | = | 0.00951                                                                                           |
| Rice kcal/day availability                  | * | 141.2       | * | 0.314              | * | 4.320                      | * | 0.0008705                                                                          | = | 0.16697                                                                                           |
| Sweet potatoes kcal/day availability        | * | 22.67       | * | 0.023              | * | 7.977                      | * | 0.0008705                                                                          | = | 0.00362                                                                                           |
| Physical activity METs                      |   |             |   |                    |   |                            |   | 0.20087                                                                            | = | 0.20087                                                                                           |
| Total Kcal/day availability                 |   |             |   |                    |   |                            |   |                                                                                    |   |                                                                                                   |
| Child/infant underweight                    |   |             |   |                    |   |                            |   |                                                                                    |   |                                                                                                   |
| Discontinued breast feed <6 months          |   |             |   |                    |   |                            |   |                                                                                    |   |                                                                                                   |
| Sums                                        |   |             |   |                    |   |                            |   |                                                                                    |   | 1.37098                                                                                           |
| Sums                                        |   |             |   |                    |   |                            |   |                                                                                    |   | 1.37098                                                                                           |
| BMI formula R2                              |   |             |   |                    |   |                            |   |                                                                                    |   | 0.73530                                                                                           |
| BMI formula R2 / sum of parameter estimates |   |             |   |                    |   |                            |   |                                                                                    |   | 0.53633                                                                                           |

643  
644  
645  
646

647

**Supplementary Table 5 Continued**

| A                                                  | L                                       | M                             | N                                                     | O                               | P | Q                                                       | R | S                                                                      |
|----------------------------------------------------|-----------------------------------------|-------------------------------|-------------------------------------------------------|---------------------------------|---|---------------------------------------------------------|---|------------------------------------------------------------------------|
| <b>Variables in BMI formula</b>                    | <b>Adjust column K <math>\mu</math></b> | <b>Add other risk factors</b> | <b>Adjust column M by multiplying by M28 = 0.1211</b> | <b>Com-bine columns L and N</b> |   | <b>Check result with statistics software SAS Studio</b> |   | <b>Final BMI formula percent weights: Column O * 0.9208 (O30) *100</b> |
| Processed meat kcal/day                            | 0.00315                                 |                               |                                                       | 0.00315                         | + | Processed meat                                          | * | 0.29                                                                   |
| Red meat kcal/day                                  | 0.12874                                 |                               |                                                       | 0.12874                         | + | Red meat                                                | * | 11.87                                                                  |
| Fish kcal/day                                      | 0.00018                                 |                               |                                                       | 0.00018                         | + | Fish                                                    | * | 0.02                                                                   |
| Milk kcal/day                                      | 0.04051                                 |                               |                                                       | 0.04051                         | + | Milk                                                    | * | 3.74                                                                   |
| Poultry kcal/day                                   | 0.12022                                 |                               |                                                       | 0.12022                         | + | Poultry                                                 | * | 11.09                                                                  |
| Eggs kcal/day                                      | 0.05906                                 |                               |                                                       | 0.05906                         | + | Eggs                                                    | * | 5.45                                                                   |
| Alcohol kcal/day                                   | 0.02117                                 |                               |                                                       | 0.02117                         | + | Alcohol                                                 | * | 1.95                                                                   |
| Sugary beverages kcal/day                          | 0.06823                                 |                               |                                                       | 0.06823                         | + | Sugary beverages                                        | * | 6.29                                                                   |
| Corn kcal/day                                      | 0.00317                                 |                               |                                                       | 0.00317                         | + | Corn                                                    | * | 0.29                                                                   |
| Potatoes kcal/day                                  | 0.03828                                 |                               |                                                       | 0.03828                         | + | Potatoes                                                | * | 3.53                                                                   |
| Saturated fatty acids                              | 0.02940                                 |                               |                                                       | 0.02940                         | + | SFA                                                     | * | 2.71                                                                   |
| Polyunsaturated fatty acids                        | 0.00696                                 |                               |                                                       | 0.00696                         | + | PUFA                                                    | * | 0.64                                                                   |
| Trans fatty acids                                  | 0.00070                                 |                               |                                                       | 0.00070                         | + | TFA                                                     | * | 0.06                                                                   |
| Fruits kcal/day                                    | 0.00401                                 |                               |                                                       | 0.00401                         | - | Fruits                                                  | * | 0.37                                                                   |
| Vegetables kcal/day                                | 0.00561                                 |                               |                                                       | 0.00561                         | - | Vegetables                                              | * | 0.52                                                                   |
| Nuts and seeds kcal/day                            | 0.00030                                 |                               |                                                       | 0.00030                         | - | Nuts and seeds                                          | * | 0.03                                                                   |
| Whole grains kcal/day                              | 0.00130                                 |                               |                                                       | 0.00130                         | - | Whole grains                                            | * | 0.12                                                                   |
| Legumes kcal/day                                   | 0.00510                                 |                               |                                                       | 0.00510                         | - | Legumes                                                 | * | 0.47                                                                   |
| Rice kcal/day                                      | 0.08955                                 |                               |                                                       | 0.08955                         | - | Rice                                                    | * | 8.26                                                                   |
| Sweet potatoes kcal/day                            | 0.00194                                 |                               |                                                       | 0.00194                         | - | Sweet Potatoes                                          | * | 0.18                                                                   |
| Physical activity                                  | 0.10773                                 |                               |                                                       | 0.10773                         | - | Physical activity                                       | * | 9.93                                                                   |
| <b>Total Kcal/day</b>                              |                                         | 0.5408                        | 0.063                                                 | 0.06270                         | + | Total kcal                                              | * | 5.78                                                                   |
| <b>Child/infant underweight</b>                    |                                         | 0.3865                        | 0.045                                                 | 0.04481                         | - | Child underweight                                       | * | 4.13                                                                   |
| <b>Discontinued breast feed &lt;6 months</b>       |                                         | 0.0861                        | 0.010                                                 | 0.00999                         | + | Discontinued breast feeding                             | * | 0.92                                                                   |
| <b>Sums</b>                                        | 0.7353                                  | 1.0133                        | 0.118                                                 | 0.85280                         |   |                                                         |   | 78.64                                                                  |
| <b>Sums</b>                                        |                                         | 1.0133                        |                                                       | 0.85280                         |   |                                                         |   |                                                                        |
| <b>BMI formula R2</b>                              |                                         | 0.1175                        |                                                       | 0.78643                         |   |                                                         |   | 0.79                                                                   |
| <b>BMI formula R2 / sum of parameter estimates</b> |                                         | 0.1160                        |                                                       | 0.92218                         |   |                                                         |   | 100.00                                                                 |

648  $\mu$  Adjust column K by K28 = 0.5314 (foods and physical activity BMI formula R<sup>2</sup> (K27) / parameter estimate sums (K26)

649

650

651 **Supplementary Table 6. Spreadsheet derivation of BMI trend formula**

| A                                                                      | B | C           | D | E                                   | F | G                                                   | H | I                                                                                  |
|------------------------------------------------------------------------|---|-------------|---|-------------------------------------|---|-----------------------------------------------------|---|------------------------------------------------------------------------------------|
| <b>BMI trend risk factor trends</b>                                    |   | <b>Mean</b> |   | <b>Risk factor with BMI17fts R2</b> |   | <b>Parameter estimates from multiple regression</b> |   | <b>Column C *<br/>Column E *<br/>Column G=<br/>preliminary parameter estimates</b> |
| <b>Processed meat kcal/day trend</b>                                   | * | 5.486       | * | 0.0001                              | * |                                                     | = | 0.000                                                                              |
| <b>Red meat kcal/day trend</b>                                         | * | 50.695      | * | 0.1650                              | * | 0.01645                                             | = | 0.138                                                                              |
| <b>Fish kcal/day trend</b>                                             | * | 10.015      | * | 0.0251                              | * |                                                     | = | 0.000                                                                              |
| <b>Milk kcal/day trend</b>                                             | * | 25.372      | * | 0.0425                              | * | 0.01645                                             | = | 0.018                                                                              |
| <b>Poultry kcal/day trend</b>                                          | * | 45.059      | * | 0.1768                              | * | 0.01645                                             | = | 0.131                                                                              |
| <b>Eggs kcal/day trend</b>                                             | * | 19.466      | * | 0.2322                              | * | 0.01645                                             | = | 0.074                                                                              |
| <b>Alcohol kcal/day trend</b>                                          | * | 81.713      | * | 0.0826                              | * | 0.01645                                             | = | 0.111                                                                              |
| <b>Sugary beverages kcal/day trend</b>                                 | * | 297.648     | * | 0.0156                              | * | 0.01645                                             | = | 0.077                                                                              |
| <b>Corn kcal/day available trend</b>                                   | * | 34.669      | * | 0.0198                              | * | 0.01645                                             | = | 0.011                                                                              |
| <b>Potatoes available kcal/day available trend</b>                     | * | 84.160      | * | 0.0739                              | * | 0.01645                                             | = | 0.102                                                                              |
| <b>Saturated fatty acids trend</b>                                     | * | 191.27      | * |                                     |   |                                                     |   |                                                                                    |
| <b>Polyunsaturated fatty acids trend</b>                               | * | 82.24       | * | 0.0820                              |   | 0.01645                                             |   | 0.111                                                                              |
| <b>Trans fatty acids trend</b>                                         | * | 13.4        | * |                                     |   |                                                     |   |                                                                                    |
| <b>Fruits kcal/day trend</b>                                           | * | 40.388      | * | 0.2301                              | * |                                                     |   | 0.000                                                                              |
| <b>Vegetables kcal/day trend</b>                                       | * | 80.141      | * | 0.1559                              | * |                                                     |   | 0.000                                                                              |
| <b>Nuts and seeds kcal/day trend</b>                                   | * | 8.510       | * | 0.0152                              | * |                                                     |   | 0.000                                                                              |
| <b>Whole grains kcal/day trend</b>                                     | * | 55.647      | * | 0.0107                              | * |                                                     | = | 0.000                                                                              |
| <b>Legumes kcal/day trend</b>                                          | * | 51.657      | * | 0.0887                              | * | 0.00404                                             | = | 0.019                                                                              |
| <b>Rice kcal/day available trend</b>                                   | * | 141.230     | * | 0.1536                              | * | 0.00404                                             | = | 0.088                                                                              |
| <b>Sweet potatoes available kcal/day trend</b>                         | * | 22.667      | * | 0.2487                              | * | 0.00404                                             | = | 0.023                                                                              |
| <b>Physical activity mets trend</b>                                    |   |             |   |                                     |   |                                                     |   |                                                                                    |
| <b>Kcal available/day trend</b>                                        |   |             |   |                                     | * | 0.17225                                             | = | 0.17225                                                                            |
| <b>Child/infant 2SD underweight trend</b>                              |   |             |   |                                     |   |                                                     |   |                                                                                    |
| <b>Discontinued breast feeding &lt;6 mo trend</b>                      |   |             |   |                                     |   |                                                     |   |                                                                                    |
| <b>Sums</b>                                                            |   |             |   |                                     |   |                                                     |   | 1.07414                                                                            |
| <b>Sum</b>                                                             |   |             |   |                                     |   |                                                     |   | 1.07414                                                                            |
| <b>R<sup>2</sup></b>                                                   |   |             |   |                                     |   |                                                     |   | 0.37790                                                                            |
| <b>Trend R<sup>2</sup> / trend BMI formula parameter estimates sum</b> |   |             |   |                                     |   |                                                     |   | 0.35182                                                                            |

652  
653  
654

655

**Spreadsheet derivation of BMI trend formula continued**

| A                                                                          | I                                                                                          | J                                                                                                                            | K | L                                                                                   | M | N                                                                                   |
|----------------------------------------------------------------------------|--------------------------------------------------------------------------------------------|------------------------------------------------------------------------------------------------------------------------------|---|-------------------------------------------------------------------------------------|---|-------------------------------------------------------------------------------------|
| <b>BMI trend risk factor trends</b>                                        | <b>Column C *<br/>Column E *<br/>Column G=<br/>preliminary<br/>parameter<br/>estimates</b> | <b>Column I<br/>adjusted to<br/>equate to<br/>parameter<br/>estimates<br/>sum to R2<br/>of the BMI<br/>trend<br/>formula</b> |   | <b>Final BMI trend<br/>formula to check<br/>percent weights with<br/>SAS Studio</b> |   | <b>Column J *<br/>100 to<br/>derive<br/>percent<br/>weights of<br/>risk factors</b> |
| <b>Processed meat kcal/day trend</b>                                       | 0.000                                                                                      |                                                                                                                              |   | pmeat17KCts                                                                         |   |                                                                                     |
| <b>Red meat kcal/day trend</b>                                             | 0.138                                                                                      | 0.048                                                                                                                        | + | rmeat17KCts                                                                         | * | 4.841                                                                               |
| <b>Fish kcal/day trend</b>                                                 | 0.000                                                                                      | 0.000                                                                                                                        |   | fish17KCts                                                                          |   |                                                                                     |
| <b>Milk kcal/day trend</b>                                                 | 0.018                                                                                      | 0.006                                                                                                                        | + | milk17KCts                                                                          | * | 0.624                                                                               |
| <b>Poultry kcal/day trend</b>                                              | 0.131                                                                                      | 0.046                                                                                                                        | + | poultry16KCts                                                                       | * | 4.610                                                                               |
| <b>Eggs kcal/day trend</b>                                                 | 0.074                                                                                      | 0.026                                                                                                                        | + | eggs16KCts                                                                          | * | 2.616                                                                               |
| <b>Alcohol kcal/day trend</b>                                              | 0.111                                                                                      | 0.039                                                                                                                        | + | Alcohol17KCts                                                                       | * | 3.908                                                                               |
| <b>Sugary beverages kcal/day<br/>trend</b>                                 | 0.077                                                                                      | 0.027                                                                                                                        | + | Sugarb17KCts                                                                        | * | 2.692                                                                               |
| <b>Corn kcal/day available trend</b>                                       | 0.011                                                                                      | 0.004                                                                                                                        | + | corn16KCts                                                                          | * | 0.397                                                                               |
| <b>Potatoes available kcal/day<br/>available trend</b>                     | 0.102                                                                                      | 0.036                                                                                                                        | + | potatoes16KCts                                                                      | * | 3.600                                                                               |
| <b>Saturated fatty acids trend</b>                                         |                                                                                            | 0.000                                                                                                                        |   |                                                                                     |   |                                                                                     |
| <b>Polyunsaturated fatty acids<br/>trend</b>                               | 0.111                                                                                      | 0.039                                                                                                                        | + | PUFA17KCts                                                                          | * | 3.904                                                                               |
| <b>Trans fatty acids trend</b>                                             |                                                                                            | 0.000                                                                                                                        |   |                                                                                     |   |                                                                                     |
| <b>Fruits kcal/day trend</b>                                               | 0.000                                                                                      | 0.000                                                                                                                        |   | fruits17KCts                                                                        |   |                                                                                     |
| <b>Vegetables kcal/day trend</b>                                           | 0.000                                                                                      | 0.000                                                                                                                        |   | Vegetables17KCts                                                                    |   |                                                                                     |
| <b>Nuts and seeds kcal/day trend</b>                                       | 0.000                                                                                      | 0.000                                                                                                                        |   | nutsseeds17KCts                                                                     |   |                                                                                     |
| <b>Whole grains kcal/day trend</b>                                         | 0.000                                                                                      | 0.000                                                                                                                        |   | wgrains17KCts                                                                       |   |                                                                                     |
| <b>Legumes kcal/day trend</b>                                              | 0.019                                                                                      | 0.007                                                                                                                        | - | legumes17KCts                                                                       | * | 0.651                                                                               |
| <b>Rice kcal/day available trend</b>                                       | 0.088                                                                                      | 0.031                                                                                                                        | - | rice16KCts                                                                          | * | 3.084                                                                               |
| <b>Sweet potatoes available<br/>kcal/day trend</b>                         | 0.023                                                                                      | 0.008                                                                                                                        | - | swtpot16KCts                                                                        | * | 0.801                                                                               |
| <b>Physical activity mets trend</b>                                        |                                                                                            | 0.000                                                                                                                        |   | PAMETs17ts                                                                          |   |                                                                                     |
| <b>Kcal available/day trend</b>                                            | 0.172                                                                                      | 0.061                                                                                                                        | + | KCal2016ts                                                                          | * | 6.060                                                                               |
| <b>Child/infant 2SD underweight<br/>trend</b>                              |                                                                                            |                                                                                                                              |   | Childunwt17ts                                                                       |   |                                                                                     |
| <b>Discontinued breast feeding<br/>&lt;6 mo trend</b>                      |                                                                                            |                                                                                                                              |   | discbreastF17ts                                                                     |   |                                                                                     |
| <b>Sums</b>                                                                | 1.074                                                                                      | 0.378                                                                                                                        |   |                                                                                     |   | 37.79                                                                               |
| <b>Sum</b>                                                                 | 1.074                                                                                      |                                                                                                                              |   |                                                                                     |   | 0.37790                                                                             |
| <b>R<sup>2</sup></b>                                                       | 0.378                                                                                      |                                                                                                                              |   |                                                                                     |   | 100.00                                                                              |
| <b>Trend R<sup>2</sup> / trend BMI formula<br/>parameter estimates sum</b> | 0.352                                                                                      |                                                                                                                              |   |                                                                                     |   |                                                                                     |

656

657

658 **Supplementary Table 7. Cross validation experiment with 20 randomised controlled trials**  
 659 **of n=100**

| <b>Risk factors</b>                         | <b>RCT1<br/>Percent<br/>Weights</b> | <b>RCT2<br/>Percent<br/>Weights</b> | <b>RCT3<br/>Percent<br/>Weights</b> | <b>RCT4<br/>Percent<br/>Weights</b> | <b>RCT5<br/>Percent<br/>Weights</b> |
|---------------------------------------------|-------------------------------------|-------------------------------------|-------------------------------------|-------------------------------------|-------------------------------------|
| Processed meat kcal/day                     | 0.39                                | 0.22                                | 0.14                                | 0.22                                | 0.11                                |
| Red meat kcal/day                           | 13.27                               | 8.57                                | 6.41                                | 7.71                                | 5.41                                |
| Fish kcal/day                               | 0.00                                | 0.01                                | 0.01                                | 0.02                                | 0.01                                |
| Milk kcal/day                               | 5.96                                | 3.58                                | 1.38                                | 2.72                                | 1.42                                |
| Poultry kcal/day available                  | 13.66                               | 8.22                                | 5.35                                | 8.90                                | 5.53                                |
| Eggs kcal/day available                     | 5.43                                | 3.72                                | 2.50                                | 4.35                                | 3.72                                |
| Alcohol kcal/day                            | 0.56                                | 1.58                                | 0.30                                | 1.76                                | 0.93                                |
| Sugary beverages kcal/day                   | 0.01                                | 8.49                                | 13.37                               | 9.67                                | 11.67                               |
| Corn kcal/day available                     | 0.01                                | 0.16                                | 0.19                                | 1.96                                | 1.04                                |
| potatoes kcal/day available                 | 2.17                                | 0.83                                | 4.55                                | 2.36                                | 2.60                                |
| Saturated fatty acids kcal/day              | 1.79                                | 7.70                                | 3.12                                | 1.44                                | 3.71                                |
| Polyunsaturated fatty acids kcal/day        | 0.51                                | 1.58                                | 0.88                                | 0.48                                | 0.86                                |
| Trans fatty acids kcal/day                  | 0.05                                | 0.20                                | 0.08                                | 0.07                                | 0.07                                |
| Fruits kcal/day                             | 0.29                                | 0.73                                | 0.56                                | 0.28                                | 0.79                                |
| Vegetables kcal/day                         | 0.45                                | 1.05                                | 0.59                                | 0.63                                | 0.89                                |
| Nuts and seeds kcal/day                     | 0.03                                | 0.06                                | 0.03                                | 0.02                                | 0.05                                |
| Whole grains kcal/day                       | 0.18                                | 0.26                                | 0.04                                | 0.06                                | 0.01                                |
| Legumes kcal/day                            | 0.46                                | 1.10                                | 0.65                                | 0.24                                | 0.47                                |
| Rice kcal/day available                     | 3.40                                | 12.76                               | 9.29                                | 7.81                                | 8.14                                |
| Sweet potatoes kcal/day available           | 0.05                                | 0.74                                | 0.18                                | 0.53                                | 0.06                                |
| Physical activity METs                      | 13.08                               | 13.10                               | 7.90                                | 9.28                                | 7.11                                |
| Kcal available/day                          | 6.52                                | 3.72                                | 10.22                               | 8.31                                | 14.90                               |
| Child/infant 2SD underweight                | 4.86                                | 2.49                                | 7.62                                | 6.03                                | 10.51                               |
| Discontinued breast feeding <6 mo           | 1.52                                | 0.52                                | 0.42                                | 0.45                                | 2.34                                |
| <b>Total percent weights in BMI formula</b> | <b>74.65</b>                        | <b>81.39</b>                        | <b>75.77</b>                        | <b>75.28</b>                        | <b>82.35</b>                        |

660 **Supplementary Table 7. continued**  
 661

| <b>Risk factors</b>            | <b>RCT6<br/>Percent<br/>weights</b> | <b>RCT7<br/>Percent<br/>weights</b> | <b>RCT8<br/>Percent<br/>weights</b> | <b>RCT9<br/>Percent<br/>weights</b> | <b>RCT10<br/>Percent<br/>weights</b> |
|--------------------------------|-------------------------------------|-------------------------------------|-------------------------------------|-------------------------------------|--------------------------------------|
| Processed meat kcal/day        | 0.27                                | 0.34                                | 0.26                                | 0.39                                | 0.33                                 |
| Red meat kcal/day              | 8.14                                | 11.88                               | 8.69                                | 13.49                               | 14.38                                |
| Fish kcal/day                  | 0.01                                | 0.04                                | 0.02                                | 0.04                                | 0.03                                 |
| Milk kcal/day                  | 2.89                                | 3.98                                | 1.89                                | 3.47                                | 4.88                                 |
| Poultry kcal/day available     | 6.69                                | 11.11                               | 5.89                                | 7.89                                | 15.53                                |
| Eggs kcal/day available        | 4.41                                | 5.84                                | 4.14                                | 6.21                                | 7.18                                 |
| Alcohol kcal/day               | 0.11                                | 4.39                                | 0.62                                | 7.92                                | 1.26                                 |
| Sugary beverages kcal/day      | 10.44                               | 4.11                                | 14.62                               | 0.34                                | 1.79                                 |
| Corn kcal/day available        | 0.01                                | 0.00                                | 0.82                                | 1.49                                | 0.01                                 |
| potatoes kcal/day available    | 1.82                                | 1.97                                | 1.80                                | 2.15                                | 5.32                                 |
| Saturated fatty acids kcal/day | 8.18                                | 1.87                                | 1.97                                | 3.01                                | 2.42                                 |

|                                             |       |       |       |       |       |
|---------------------------------------------|-------|-------|-------|-------|-------|
| <b>Polyunsaturated fatty acids kcal/day</b> | 1.22  | 0.41  | 0.54  | 0.56  | 0.45  |
| <b>Trans fatty acids kcal/day</b>           | 0.13  | 0.07  | 0.07  | 0.06  | 0.04  |
| <b>Fruits kcal/day</b>                      | 0.71  | 0.33  | 0.36  | 0.43  | 0.35  |
| <b>Vegetables kcal/day</b>                  | 1.31  | 0.37  | 0.41  | 0.77  | 0.41  |
| <b>Nuts and seeds kcal/day</b>              | 0.07  | 0.02  | 0.03  | 0.06  | 0.03  |
| <b>Whole grains kcal/day</b>                | 0.30  | 0.16  | 0.00  | 0.22  | 0.08  |
| <b>Legumes kcal/day</b>                     | 1.54  | 0.39  | 0.47  | 0.57  | 0.46  |
| <b>Rice kcal/day available</b>              | 11.87 | 11.51 | 8.24  | 8.93  | 3.53  |
| <b>Sweet potatoes kcal/day available</b>    | 0.61  | 0.03  | 0.79  | 0.32  | 0.10  |
| <b>Physical activity METs</b>               | 4.24  | 11.48 | 11.91 | 9.73  | 11.59 |
| <b>Kcal available/day</b>                   | 7.47  | 4.25  | 6.31  | 7.51  | 3.68  |
| <b>Child/infant 2SD underweight</b>         | 5.93  | 4.09  | 4.88  | 4.10  | 4.02  |
| <b>Discontinued breast feeding &lt;6 mo</b> | 1.92  | 1.47  | 2.96  | 1.65  | 0.62  |
| <b>Total percent weights in BMI formula</b> | 74.65 | 81.39 | 75.77 | 75.28 | 82.35 |

662  
663  
664

**Supplementary Table 7. continued**

| <b>Risk factors</b>                         | <b>RCT11<br/>Percent<br/>weights</b> | <b>RCT12<br/>Percent<br/>weights</b> | <b>RCT13<br/>Percent<br/>weights</b> | <b>RCT14<br/>Percent<br/>weights</b> | <b>RCT15<br/>Percent<br/>weights</b> |
|---------------------------------------------|--------------------------------------|--------------------------------------|--------------------------------------|--------------------------------------|--------------------------------------|
| <b>Processed meat kcal/day</b>              | 0.13                                 | 0.18                                 | 0.28                                 | 0.35                                 | 0.16                                 |
| <b>Red meat kcal/day</b>                    | 6.31                                 | 6.46                                 | 12.56                                | 11.78                                | 6.90                                 |
| <b>Fish kcal/day</b>                        | 0.01                                 | 0.02                                 | 0.02                                 | 0.01                                 | 0.01                                 |
| <b>Milk kcal/day</b>                        | 1.70                                 | 2.12                                 | 3.83                                 | 2.99                                 | 2.35                                 |
| <b>Poultry kcal/day available</b>           | 7.81                                 | 6.50                                 | 11.94                                | 11.25                                | 7.17                                 |
| <b>Eggs kcal/day available</b>              | 2.82                                 | 3.48                                 | 5.55                                 | 5.44                                 | 2.83                                 |
| <b>Alcohol kcal/day</b>                     | 0.21                                 | 0.06                                 | 0.60                                 | 0.13                                 | 1.35                                 |
| <b>Sugary beverages kcal/day</b>            | 10.33                                | 8.84                                 | 4.75                                 | 4.17                                 | 10.87                                |
| <b>Corn kcal/day available</b>              | 1.32                                 | 0.33                                 | 1.21                                 | 0.81                                 | 1.29                                 |
| <b>potatoes kcal/day available</b>          | 1.73                                 | 2.12                                 | 7.81                                 | 2.91                                 | 0.01                                 |
| <b>Saturated fatty acids kcal/day</b>       | 2.90                                 | 2.49                                 | 2.40                                 | 2.90                                 | 3.65                                 |
| <b>Polyunsaturated fatty acids kcal/day</b> | 0.58                                 | 0.70                                 | 0.56                                 | 0.44                                 | 0.88                                 |
| <b>Trans fatty acids kcal/day</b>           | 0.05                                 | 0.15                                 | 0.03                                 | 0.08                                 | 0.17                                 |
| <b>Fruits kcal/day</b>                      | 0.28                                 | 0.43                                 | 0.34                                 | 0.50                                 | 0.75                                 |
| <b>Vegetables kcal/day</b>                  | 0.64                                 | 0.68                                 | 0.40                                 | 0.61                                 | 0.84                                 |
| <b>Nuts and seeds kcal/day</b>              | 0.01                                 | 0.02                                 | 0.02                                 | 0.03                                 | 0.04                                 |
| <b>Whole grains kcal/day</b>                | 0.16                                 | 0.39                                 | 0.22                                 | 0.21                                 | 0.06                                 |
| <b>Legumes kcal/day</b>                     | 0.38                                 | 0.89                                 | 0.77                                 | 0.29                                 | 0.65                                 |
| <b>Rice kcal/day available</b>              | 9.30                                 | 10.10                                | 8.34                                 | 9.08                                 | 7.09                                 |
| <b>Sweet potatoes kcal/day available</b>    | 0.12                                 | 0.18                                 | 0.04                                 | 0.25                                 | 0.67                                 |
| <b>Physical activity METs</b>               | 9.01                                 | 10.97                                | 6.78                                 | 9.80                                 | 10.34                                |
| <b>Kcal available/day</b>                   | 13.56                                | 11.05                                | 4.34                                 | 7.80                                 | 12.42                                |
| <b>Child/infant 2SD underweight</b>         | 8.29                                 | 8.08                                 | 4.01                                 | 4.05                                 | 7.08                                 |
| <b>Discontinued breast feeding &lt;6 mo</b> | 0.32                                 | 0.20                                 | 0.58                                 | 0.47                                 | 1.52                                 |
| <b>Total percent weights in BMI formula</b> | 77.97                                | 76.44                                | 77.38                                | 76.37                                | 79.09                                |

665  
666



667 **Supplementary Table 7. continued**

| <b>Risk factors</b>                         | <b>RCT16<br/>Percent<br/>weights</b> | <b>RCT17<br/>Percent<br/>weights</b> | <b>RCT18<br/>Percent<br/>weights</b> | <b>RCT19<br/>Percent<br/>weights</b> | <b>RCT20<br/>Percent<br/>weights</b> |
|---------------------------------------------|--------------------------------------|--------------------------------------|--------------------------------------|--------------------------------------|--------------------------------------|
| <b>Processed meat kcal/day</b>              | 0.33                                 | 0.21                                 | 0.29                                 | 0.43                                 | 0.26                                 |
| <b>Red meat kcal/day</b>                    | 13.14                                | 7.99                                 | 7.48                                 | 14.07                                | 11.69                                |
| <b>Fish kcal/day</b>                        | 0.02                                 | 0.02                                 | 0.01                                 | 1.97                                 | 1.28                                 |
| <b>Milk kcal/day</b>                        | 3.65                                 | 2.02                                 | 4.49                                 | 4.10                                 | 3.12                                 |
| <b>Poultry kcal/day available</b>           | 11.06                                | 5.98                                 | 9.24                                 | 11.22                                | 11.02                                |
| <b>Eggs kcal/day available</b>              | 4.90                                 | 3.25                                 | 4.17                                 | 7.73                                 | 5.61                                 |
| <b>Alcohol kcal/day</b>                     | 4.34                                 | 1.52                                 | 0.01                                 | 4.10                                 | 3.80                                 |
| <b>Sugary beverages kcal/day</b>            | 1.58                                 | 12.85                                | 7.01                                 | 3.37                                 | 6.49                                 |
| <b>Corn kcal/day available</b>              | 2.00                                 | 0.42                                 | 1.95                                 | 0.17                                 | 0.77                                 |
| <b>potatoes kcal/day available</b>          | 2.98                                 | 0.18                                 | 3.88                                 | 6.20                                 | 2.33                                 |
| <b>Saturated fatty acids kcal/day</b>       | 1.20                                 | 5.43                                 | 1.81                                 | 0.90                                 | 2.87                                 |
| <b>Polyunsaturated fatty acids kcal/day</b> | 0.29                                 | 1.50                                 | 0.49                                 | 0.18                                 | 1.07                                 |
| <b>Trans fatty acids kcal/day</b>           | 0.05                                 | 0.18                                 | 0.06                                 | 0.03                                 | 0.07                                 |
| <b>Fruits kcal/day</b>                      | 0.23                                 | 0.88                                 | 0.35                                 | 0.12                                 | 0.47                                 |
| <b>Vegetables kcal/day</b>                  | 0.32                                 | 1.17                                 | 0.54                                 | 0.23                                 | 0.38                                 |
| <b>Nuts and seeds kcal/day</b>              | 0.02                                 | 0.05                                 | 0.03                                 | 0.01                                 | 0.04                                 |
| <b>Whole grains kcal/day</b>                | 0.03                                 | 0.00                                 | 0.04                                 | 0.12                                 | 0.02                                 |
| <b>Legumes kcal/day</b>                     | 0.17                                 | 0.68                                 | 0.40                                 | 0.09                                 | 0.56                                 |
| <b>Rice kcal/day available</b>              | 7.18                                 | 12.12                                | 9.14                                 | 6.79                                 | 13.19                                |
| <b>Sweet potatoes kcal/day available</b>    | 0.02                                 | 1.13                                 | 0.04                                 | 0.22                                 | 0.21                                 |
| <b>Physical activity METs</b>               | 13.29                                | 4.32                                 | 12.97                                | 9.16                                 | 9.16                                 |
| <b>Kcal available/day</b>                   | 8.12                                 | 9.24                                 | 7.45                                 | 6.10                                 | 4.78                                 |
| <b>Child/infant 2SD underweight</b>         | 4.37                                 | 5.50                                 | 6.14                                 | 3.27                                 | 2.89                                 |
| <b>Discontinued breast feeding &lt;6 mo</b> | 1.29                                 | 2.87                                 | 0.49                                 | 1.22                                 | 0.95                                 |
| <b>Total percent weights in BMI formula</b> | 80.57                                | 79.47                                | 78.50                                | 81.80                                | 83.04                                |

668

669 Appendix 1. Worldwide surveys contributing to the IHME GBD risk  
670 factor data.

671 Online only.

672

## 673 **Appendix 2. Bradford Hill causality criteria based** 674 **assessment methodology detailed**

675 A literature search revealed no published methodological precedents for statistically modeling  
676 the correlation between mean BMIs of worldwide countries and subnational  
677 regions/provinces/states and their corresponding dietary and other risk factors. Since the  
678 Bradford Hill causality criteria<sup>1</sup> (enumerated by the English occupational physician and  
679 epidemiologist Sir Austin Bradford Hill) are the gold standard assessment tools to test causality  
680 of risk factors related to health outcomes, we explored the data looking for mean BMI to risk  
681 factor correlations that could be tested with the Bradford Hill criteria.

682  
683 The relevant causality criteria included #1 strength, #2 consistency, #3 dose-response (biological  
684 gradient), #4 temporality, #5 analogy, #6 plausibility, #7 experimentation, and #8 coherence. The  
685 non applicable criterion is specificity. Since diet, physical activity, and other risk factors may  
686 affect many non-communicable disease health outcomes, specificity is not relevant. As Dr.  
687 Bradford Hill said, “In short, if specificity exists we may be able to draw conclusions without  
688 hesitation; if it is not apparent, we are not thereby necessarily left sitting irresolutely on the  
689 fence.”<sup>1</sup>

690  
691 In considering many candidate methodologies involving univariate and multiple regression  
692 analysis, we sought a technique that produced the worldwide BMI versus risk factors multiple  
693 regression formula which most accurately predicted the mean BMI of subgroups (e.g.,  
694 continents, socio-economic index quartiles, etc.). Such a BMI formula with quantifiable high  
695 accuracy in predicting the mean BMI of subgroups would necessarily score high with the

696 Bradford Hill criteria strength, consistency, and dose-response (biological gradient). Of the  
697 candidate statistical modeling strategies, the methodology that created the worldwide BMI  
698 formula that most accurately estimated subgroup mean BMIs had the following steps:

699

700 1. Transform all the food group risk factors (i.e., alcohol, total sugar, plant foods,  
701 animal foods, and fatty acids) from g/day to kilocalories/day (kcal/day).

702 2. Multiply each food group risk factor by its mean kcal/day consumption.

703 3. Multiply each risk factor by the  $R^2$  (coefficient of determination) of its  
704 univariate correlation with BMI.

705 4. Adjust for multicollinearities (any animal or plant risk factors in the  
706 combination variables that have significant multicollinearity (when an  
707 independent variable is highly correlated with one or more of the other  
708 independent variables in a multiple regression equation)).

709 5. After performing #2, #3, and #4 above, form combination dietary variables  
710 with individual foods each expressed in kcal/day to be added together as the  
711 data suggests are appropriate:

712 a. For example: processed meat \* processed meat kcal/day \* processed  
713 meat  $R^2$  \* processed meat kcal/day in bottom three SDI quartiles/top  
714 quartile + red meat \* red meat  $R^2$  \* red meat kcal/day \* red meat  
715 kcal/day in bottom three SDI quartiles/ kcal/day in the top quartile +  
716 ...+ eggs \* eggs kcal/day, etc.

- 717                   b. Explore methods to adjust for multicollinearities based in part on maximizing  
718                   the closeness of fit of the multiple regression derived BMI formula outputs  
719                   with the mean BMIs of 37 subgroups of the worldwide data.
- 720           6. Add physical activity before performing multiple regression.
- 721           7. Perform multiple regression analysis with the food combination variables in #5 and  
722           physical activity to generate a BMI formula. (e.g., BMI formula= combination  
723           variable<sub>a</sub> \* parameter estimate<sub>a</sub> + combination variables<sub>b</sub> \* parameter estimate<sub>b</sub> ...+  
724           physical activity \* parameter estimate of physical activity.
- 725           8. Explore integrating the variables kcal available, child underweight, and discontinued  
726           breast feeding into the BMI formula.
- 727           9. Discard any of these variables that's sign in regression with BMI switches from  
728           univariate to the multivariate analysis (e.g., + in univariate and - in multivariate  
729           formula).
- 730           10. To simplify the calculations, use the Excel spreadsheet and transfer back and forth to  
731           SAS Studio.
- 732           11. To test the BMI formula with subgroups, match the BMI formula mean and standard  
733           deviation (SD) with that of mean worldwide BMI:
- 734                   a. Adjust the SD of the BMI formula output to equal the SD of the worldwide  
735                   BMI by multiplying the BMI formula output times the BMI SD / BMI  
736                   formula SD.
- 737                   b. Adjust the BMI formula constant to equal the worldwide population's mean  
738                   BMI by adding the difference between the mean BMI and the BMI formula  
739                   constant.

740 12. Explore the BMI formula functionality with different Bradford Hill criteria with  
741 standardising the BMI and BMI risk factors or with all variables non standardised.

742  
743 We estimated percent weights attributable to each risk factor with the standardised BMI formula  
744 from the above methodology with the following additions:

745 1. Equate the sum of the individual food and other risk factor parameter estimates to the  
746 total  $R^2$  of the BMI formula:

747 a. Total the absolute values of the parameter estimates for each food and any non  
748 food risk factors.

749 b. Divide the worldwide BMI formula  $R^2$  by the sum of the risk factor parameter  
750 estimates.

751 c. Multiply the result of b above times each of the individual risk factor parameter  
752 estimates.

753 2. Multiply the results in #1 above times 100 to generate percent weights for each risk  
754 factor. The sum of the risk factor percent weights will equal the BMI formula  $R^2$  times  
755 100.

756  
757 To cross validate the generated worldwide BMI formula experimentally, create 20 random  
758 subgroups of 100 cohorts with the macro function in SAS. Determine each of the 20 subgroup  
759 BMI formulas, and, from those 20 BMI formulas, create a table with: mean, SD, minimum, and  
760 maximum for each of the risk factors.

761

762

763 **Bradford Hill causal criteria testing methodology applied to current study**

764 The relevant eight of the nine original Bradford Hill criteria were each scored as:

765 “5” very strongly supporting causality,

766 “4” strongly supporting causality,

767 “3” moderately strongly supporting causality,

768 “2” supporting causality,

769 “1” weakly supporting causality, and

770 “0” not supporting causality

771

772 The scoring for each Bradford Hill causal criterion was as follows:

773 1. Strength: The correlation coefficient,  $r$ , of the worldwide multiple regression derived  
774 BMI formula with BMI (dependent variable) and BMI risk factors (independent  
775 variables) assessed strength.

776 Scoring of strength:

777 5=BMI formula regressed with BMI  $r \geq 0.50$  and  $P < 0.0001$

778 4=BMI formula regressed with BMI  $0.50 > r \geq 0.40$  and  $P < 0.0001$

779 3=BMI formula regressed with BMI  $0.40 > r \geq 0.30$  and  $P < 0.0001$

780 2=BMI formula regressed with BMI  $0.30 > r \geq 0.20$  and  $P < 0.0001$

781 1=BMI formula regressed with BMI  $0.20 > r \geq 0.10$  and  $P < 0.0001$

782 0=BMI formula regressed with BMI  $r < 0.10$  or  $P \geq 0.0001$

783

- 784 2. Consistency: For the purposes of this study, consistency between BMI and BMI formula  
785 output was determined by comparing the mean BMI and the mean BMI formula output in  
786 each of the following 37 subgroups:
- 787 1) A variable socio-demographic index (SDI)—see Supplementary Table 1 for  
788 definition of SDI—divided the world’s population by quartiles of SDI.
  - 789 2) A variable “continents” allowed for analyses of countries from each of the six  
790 inhabited continents.
  - 791 3) The four countries (UK, USA, Mexico, and Japan) with subnational data on BMI and  
792 the risk factors were grouped and assessed to compare the BMI formula output with  
793 the overall mean BMI in those countries.
  - 794 4) Based on the total kcal/day of all foods that increased BMI, a combination variable  
795 was constructed and the world’s population divided into quartiles from the highest to  
796 lowest total kcal/day.
  - 797 5) Similarly, based on the total kcal/day of all foods that decreased BMI, we divided the  
798 world’s population into quartiles from the highest to lowest by total kcal/day.
  - 799 6) Based on physical activity (METs/week), the world’s population was divided into  
800 quartiles.
  - 801 7) We evaluated dose response by dividing the BMI formula output into quartiles from  
802 the highest to lowest.
  - 803 8) The four countries with subnational data were individually evaluated.
  - 804 9) The first four of the 20 random number generated database subgroups were included  
805 in the consistency analysis.
  - 806 10) Male and female were separately assessed.



807 11) Assessing dose-response was done in quartiles by the BMI formula outputs after the  
808 BMI formula was harmonized with the mean and SD of worldwide mean BMI. See  
809 the dose-response criteria (#4).

810  
811 For each of the 37 subgroups, the absolute differences between the means of BMI and the  
812 BMI formula output in were totaled (e.g., continent Africa BMI formula output - mean  
813 BMI for Africa, etc.).

814 Scoring of consistency for BMI compared with BMI formula output for each of the 37  
815 subgroups:

816 5=The mean of the absolute differences between mean BMI and BMI formula output was  
817  $\leq 0.40$  units.

818 4=The mean of the absolute differences between mean BMI and BMI formula output was  
819  $\leq 0.50$  units.

820 3=The mean of the absolute differences between mean BMI and BMI formula output was  
821  $\leq 0.60$  units.

822 2=The mean of the absolute differences between mean BMI and BMI formula output was  
823  $\leq 0.70$  units.

824 1=The mean of the absolute differences between mean BMI and BMI formula output was  
825  $\leq 1.0$  units.

826 0=The mean of the absolute differences between mean BMI and BMI formula output was  
827  $> 1.0$  units.

828

829 3. Dose-response (biological gradient): Dr. Bradford Hill thought that a clear dose-response  
830 effect on the incidence of disease with exposure to a single risk factor was the clearest  
831 evidence of a causal relationship. More recently, it has been realized that cause and effect  
832 relationships are often more complex. In this analysis of dose-response, instead of using  
833 single risk factor levels related to BMI, levels of a multivariable regression derived BMI  
834 formula outputs in quartiles were related to mean BMIs in those quartiles. Dose-response  
835 of BMI formula estimates versus mean BMI were included in the testing of consistency  
836 above.

837 Scoring of dose-response (biologic gradient) was based on this mean absolute difference  
838 when the BMI formula output was divided into quartiles:

839 5= The BMI formula output versus mean BMI absolute differences from each of the four  
840 quartiles averages  $\leq 0.40$  BMI units.

841 4= The BMI formula output versus mean BMI absolute differences from each of the four  
842 quartiles averages  $\leq 0.50$  units.

843 3= The BMI formula output versus mean BMI absolute differences from each of the four  
844 quartiles averages  $\leq 0.60$  BMI units.

845 2= The BMI formula output versus mean BMI absolute differences from each of the four  
846 quartiles averages  $\leq 0.70$  BMI units.

847 1= The BMI formula output versus mean BMI absolute differences from each of the four  
848 quartiles averages  $\leq 1.0$  BMI units.

849 0= The BMI formula output versus mean BMI absolute differences from each of the four  
850 quartiles averages  $> 1.0$  BMI units

851

852 4. Temporality: The dictionary defines the noun temporality as: "The state of existing  
853 within or having some relationship with time." Bradford Hill said, "Temporality refers to  
854 the necessity that the cause to precede the effect in time. This criterion is unarguable,  
855 insofar as any claimed observation of causation must involve the putative cause C  
856 preceding the putative effect D. It does not, however, follow that a reverse time order is  
857 evidence against the hypothesis that C can cause D. Rather, observations in which C  
858 followed D merely shows that C could not have caused D in these instances; they provide  
859 no evidence for or against the hypothesis that C can cause D in those instances in which it  
860 precedes D."

861  
862 Dr. Bradford Hill was an occupational physician before the current availability in  
863 nutritional epidemiology of data on trends over 28 years of 18 components of worldwide  
864 diets along with the global BMI trend. Consequently, now it is fair to test temporality by  
865 deriving a standardised multiple regression formula with BMI trend, measured by the  
866 slope of the least squared regression line (LSRL) over 1990-2017, as (dependent  
867 variable). The independent variables would consist of the LSRL trends over 1990-2017  
868 of the same dietary components, physical activity, and other variables as in the original  
869 BMI formula. We considered the strength ( $r$ ) of the BMI trend formula versus the BMI  
870 trend an appropriate measure of temporality. Any risk factor was excluded from the trend  
871 BMI formula if its sign (+ or -) did not match the sign in the original BMI formula.

872  
873 With a standardised multiple regression methodology similar to that of deriving risk  
874 factor percent weights above, a standardised BMI trend (dependent variable) versus

875 standardised risk factor trends (independent variables) formula was derived with the risk  
876 factor parameter estimates adjusted to equate to trend percent weights.

877 Scoring of temporality: The Pearson correlation coefficient,  $r$ , of the resulting multiple  
878 regression derived BMI trend versus risk factors trends formula:

879  $5=r \geq 0.50$  and  $P < 0.0001$ .

880  $4=0.50 > r \geq 0.40$  and  $P < 0.0001$ .

881  $3=0.40 > r \geq 0.30$  and  $P < 0.0001$ .

882  $2=0.30 > r \geq 0.20$  and  $P < 0.0001$ .

883  $1=0.20 > r \geq 0.10$  and  $P < 0.0001$ .

884  $0=r < 0.10$  or  $P \geq 0.0001$

885

886 5. Analogy: High BMI is among the four metabolic risk factors that are strongly associated with  
887 cardiovascular diseases, cancers, and other non-communicable diseases. The other major  
888 metabolic risk factors for non-communicable diseases are high systolic blood pressure (SBP),  
889 high low density lipoprotein cholesterol (LDL-C), and high fasting plasma glucose (FPG).

890

891 We tested analogy by the number of the diet, physical activity, and other variables in the  
892 percent weight of risk factor BMI formula that were also in the percent weight of risk factor  
893 formulas of the other metabolic factors and including only risk factors concordant in  
894 direction (+ or -) with the coefficients of percent weights of risk factors in the BMI formula.

895 Scoring of analogy:

896 5=At least three-quarters of BMI formula risk factors are also in the risk factor formulas  
897 of all three of the other metabolic factors (SBP, LDL-C, and FPG) and have concordant  
898 signs (+ or -) for each risk factor.

899 4= At least three-quarters of BMI formula risk factors are also in the risk factor formulas  
900 of two of the three other metabolic factors (SBP, LDL-C, and FPG) and have concordant  
901 signs (+ or -) for each risk factor.

902 3= At least three-quarters of BMI formula risk factors are also in the risk factor formulas  
903 of one of the three other metabolic factors (SBP, LDL-C, and FPG) and have concordant  
904 signs (+ or -) for each risk factor.

905 2= At least two-thirds of BMI formula risk factors are also in the risk factor formulas of  
906 one of the three other metabolic factors (SBP, LDL-C, and FPG) and have concordant  
907 signs (+ or -) for each risk factor.

908 1=At least half of BMI formula risk factors are also in the risk factor formulas of one of  
909 the three other metabolic factors (SBP, LDL-C, and FPG) and has concordant signs (+ or  
910 -) for each risk factor.

911 0= None of the above.

912

913 6. Plausibility: To test plausibility, we looked to find if any of our findings were at variance  
914 with the preponderance of studies published. We searched the medical literature  
915 particularly for systematic reviews of the relationships of foods and other variables with  
916 BMI.

917 Scoring of plausibility:

918 5=None of the current findings were at variance with the preponderance of the medical  
919 literature.

920 4= One of the current findings was at variance with the preponderance of the medical  
921 literature.

922 3= Two of the current findings were at variance with the preponderance of the medical  
923 literature.

924 2=Three of the current findings were at variance with the preponderance of the medical  
925 literature.

926 1=Four of the current findings were at variance with the preponderance of the medical  
927 literature.

928 0= Five or more of the current findings were at variance with the preponderance of the  
929 medical literature.

930

931 7. Experiment: Dr. Bradford Hill thought that evidence drawn from experimentation,  
932 including in epidemiologic studies, may lead to the strongest support for causal  
933 inference.<sup>1</sup>

934

935 We used a cross validation method to assess Bradford Hill's "experiment" criterion.

936 Random number generation of 20 subgroups each with 100 cohorts derived 20

937 standardised BMI formulas to compare with the standardised worldwide BMI formula.

938 Scoring of experiment:

939 5=At least 15 subgroups BMI formulas included all same risk factors with the same signs  
940 of coefficients as the worldwide BMI formula.

- 941 4=At least 10 subgroups of BMI formulas included all same risk factors with the same  
942 signs of coefficients as the worldwide BMI formula.
- 943 3=All 20 subgroups of BMI formulas included at least three-quarters of same risk factors  
944 with the same signs of coefficients as the worldwide BMI formula.
- 945 2=At least 10 subgroups of BMI formulas included at least three-quarters of same risk  
946 with the same signs of coefficients factors as the worldwide BMI formula.
- 947 1= At least 10 subgroups of BMI formulas included at least half of same risk factors with  
948 the same signs of coefficients as the worldwide BMI formula.
- 949 0=None of the above.
- 950
- 951 8. Coherence: According to Dr. Bradford Hill, "...cause and effect interpretation of our data  
952 should not seriously conflict with the generally known facts of the natural history and  
953 biology of the disease."<sup>1</sup> In this analysis of BMI associated with BMI formula estimates,  
954 coherence was the numerical total score of the above seven relevant causality criteria  
955 each on a 0-5 scale. The maximum score was 40.
- 956 Scoring of coherence:
- 957 5=Score on the first seven Bradford Hill causation criteria=35-40.
- 958 4=Score on the first seven Bradford Hill causation criteria=30-34.
- 959 3=Score on the first seven Bradford Hill causation criteria=25-29.
- 960 2=Score on the first seven Bradford Hill causation criteria=20-24.
- 961 1=Score on the first seven Bradford Hill causation criteria=15-24.
- 962 0=Score on the first seven Bradford Hill causation criteria<15.
- 963

964 **Reference**

965 **1. Hill AB. THE ENVIRONMENT AND DISEASE: ASSOCIATION OR CAUSATION?**

966 *Proceedings of the Royal Society of Medicine.* 1965; **58**(5):295-300.

967 <https://www.ncbi.nlm.nih.gov/pmc/articles/PMC1898525/>

968



969

970

971

972
